1 Characterization of a novel intratracheal aerosol challenge model of *Brucella melitensis* in  
2 guinea pigs

3

4

5 Hensel, M.E.<sup>a</sup>, Garcia-Gonzalez, D.G.<sup>a</sup>, Chaki, S.P.<sup>a</sup>, Samuel, J.<sup>b</sup>, and Arenas-Gamboa, A.M.<sup>a#</sup>

6 a. Texas A&M University, College of Veterinary Medicine and Biomedical Sciences,  
7 Department of Veterinary Pathobiology, College Station, Texas, USA

8 b. Texas A&M University, Health Science Center and College of Medicine, Department of  
9 Microbial Pathogenesis and Immunology, College Station, Texas, USA

10

11

12 Running head. Intratracheal inoculation with *B. melitensis* in guinea pigs

13

14 #Address correspondence to Angela Arenas-Gamboa, [aarenas@cvm.tamu.edu](mailto:aarenas@cvm.tamu.edu)

15

16

17

18

19

20

21

22

23

24

25

26

27

28

29

30

31

32

33

34

35

36

37

38

39

40

41

42

43

44

45

46

## 47 **Abstract**

48 *B. melitensis* is considered the most virulent of the *Brucella* species, and a need exists for an  
49 improved laboratory animal model of infection that mimics natural transmission and disease.  
50 Guinea pigs are highly susceptible to infection with *Brucella* spp. and develop a disease  
51 syndrome that mimics natural disease after aerosol inoculation. Intratracheal inoculation is a  
52 targeted means of generating aerosols that offer advantages over aerosol chamber delivery. To  
53 establish this delivery method, female, Hartley guinea pigs were infected via intratracheal  
54 inoculation with PBS or 16M *B. melitensis* at low dose ( $10^1$  to  $10^3$ ) or high dose ( $10^6$  to  $10^8$ ) and  
55 monitored for 30 days for signs of disease. Guinea pigs in the high dose groups developed fever  
56 between 12-17 days post-inoculation. Bacteria were recovered from the spleen, liver, lymph  
57 nodes, lung, and uterus at 30-days post-inoculation and demonstrated dose dependent mean  
58 increases in colonization and pathologic changes consistent with human brucellosis. To study the  
59 kinetics of extrapulmonary dissemination, guinea pigs were inoculated with  $10^7$  CFU and  
60 euthanized at 2-hours post inoculation and at weekly intervals for 3 weeks.  $5.8 \times 10^5$  to  $4.2 \times 10^6$   
61 CFU were recovered from the lung 2 hours post-inoculation indicating intratracheal inoculation  
62 is an efficient means of infecting guinea pigs. Starting at 1-week post inoculation bacteria were  
63 recovered from the aforementioned organs with time dependent mean increases in colonization.  
64 This data demonstrates that guinea pigs develop a disease syndrome that models the human  
65 manifestation of brucellosis, which makes the guinea pig a valuable model for pathogenesis  
66 studies.

## 67 **Author summary**

68 Brucellosis is caused by a gram-negative, intracellular bacterial pathogen with a worldwide  
69 distribution and affects up to half a million people per year. It is a neglected zoonosis that

70 impacts not only animal welfare, but also exert economic pressure on afflicted individuals  
71 through loss of wages and decreased productivity. In people, recurrent fever, malaise, and  
72 anorexia accompanied by enlargement of the spleen and lymph nodes are common clinical  
73 symptoms of infection. The mouse model has been used extensively to study the pathogenesis of  
74 brucellosis, but there are drawbacks to extrapolating studies in mice to develop vaccines or  
75 therapeutics for people. Mice are frequently inoculated via intraperitoneal injection, which is an  
76 artificial means of producing disease that does not mimic natural transmission or disease  
77 features, such as fever. An animal model is needed that can be infected through natural  
78 transmission routes and subsequently develop a syndrome that matches clinical disease seen in  
79 people in order to study the pathogenesis of disease and to develop vaccines and therapeutics.  
80 The guinea pig offers an improvement on the mouse model because it can be infected via aerosol  
81 inoculation and develops fever, a humoral immune response, systemic colonization, and  
82 macroscopic and microscopic lesions of disease. As such, guinea pigs could be used a more  
83 biologically relevant model for evaluation of host-pathogen interactions.

## 84 **Introduction**

85 Brucellosis is a disease caused by a gram-negative coccobacillus of the genus *Brucella*  
86 and is a zoonotic pathogen that has a worldwide distribution [1]. Of the twelve currently  
87 recognized *Brucella* species, *Brucella melitensis* is considered the most virulent [2]. The natural  
88 hosts of *B. melitensis* are sheep and goats [2]. The primary clinical presentation in affected small  
89 ruminants are abortion, stillbirths, and decreased fertility; bacteria are shed in large numbers  
90 after abortions in the placenta or through secretory products like milk [2]. People are commonly  
91 exposed through aerosols or by ingestion of unpasteurized milk or milk products [2]. In humans,  
92 clinical brucellosis typically manifests as relapsing periods of fever, malaise, and inappetance

93 [2]. More severe complications such as disease of the reproductive, osteoarticular,  
94 cardiovascular, or nervous systems are also possible [2, 3].

95         Aerosols are a common means of transmission in people and animals and inhalation of  
96 bacteria leads to colonization of the reticuloendothelial organs such as the spleen, liver, and  
97 lymph nodes [2]. Certain occupations are at a greater risk of exposure due to close proximity  
98 with animals including veterinarians, farmers, and abattoir workers [2]. Humans who are  
99 exposed to aerosols generated following an animal abortion event are often exposed to up to 10<sup>9</sup>  
100 colony forming units (CFU), but a dose of 10-100 CFU is reported to generate disease [2, 4].  
101 Due to the ease of aerosolization and the low infectious dose, *B. melitensis* could potentially be  
102 weaponized and is designated a Category B agent by the Centers for Disease Control and  
103 Prevention [4].

104         Animal models utilized to study human brucellosis include mice, guinea pigs, rabbits,  
105 rats, and nonhuman primates [5]. Mice are currently the most commonly used model for  
106 brucellosis due to the ready availability of many genetic and immunologic tools [5]. A drawback  
107 to murine research is the large number of infectious organisms required to induce disease, which  
108 is well above the dose required to cause infection in people, and mice do not develop fever [6, 7].  
109 Additionally, the most common means of inoculating mice with *Brucella* is intraperitoneal  
110 injection, which is not a means of natural transmission and thus the results of these experiments  
111 may not be as relevant. Guinea pigs were the animal model of choice to study the pathogenicity  
112 of *Brucella* species from the early 1900s to 1960 but were supplanted by the mouse model [8-  
113 10]. Similar to mice, guinea pigs can be infected by a variety of routes including intraperitoneal,  
114 intramuscular, subcutaneous, and inhalation. In contrast to mice, guinea pigs not only develop  
115 systemic disease but also demonstrate clinical signs of infection that include fever [11]. A need

116 exists for an animal model that can be infected via aerosol transmission and replicate key  
117 features of human disease.

118 The experiments described herein represent a novel approach to understand the  
119 pathogenesis of aerosol transmission in a guinea pig model including the dose response to  
120 infection, kinetics of dissemination after aerosol exposure, and macroscopic and microscopic  
121 pathologic findings. Previous studies have indicated that guinea pigs are a physiologically  
122 relevant model and with an updated approach to inoculation, the guinea pig could be used to  
123 investigate host-pathogen interactions.

## 124 **Results**

### 125 **Passage through the MicroSprayer® does not adversely affect bacterial viability.**

126 This study utilized the PennCentury™ MicroSprayer because it is a targeted means of  
127 generating aerosols and has been used successfully to inoculate mice with bacterial pathogens  
128 [12]. The MicroSprayer® device has not been previously used to inoculate guinea pigs. Our first  
129 objective was to determine if passage of the inoculum through the MicroSprayer® affected the  
130 bacterial viability. Bacterial suspensions of each dose were sprayed through the device and  
131 collected into 900 µl of PBS, serially diluted, and plated on TSA to calculate the number of  
132 viable bacteria. Bacterial viability was minimally affected by passage through the device. As an  
133 example, the original inoculum for guinea pigs in the 10<sup>7</sup> group contained 4.4x10<sup>7</sup> CFU/50 µl  
134 and after passage through the MicroSprayer® 4.1x10<sup>7</sup> CFU/50 µl were recovered (Table 1). This  
135 study proves that the device is a reliable means of generating an infectious aerosol and passage  
136 through the MicroSprayer® does not adversely affect the viability of the bacteria.

137

138 **Table 1** Bacterial viability following passage through the MicroSprayer® Aerosolizer.

| Dose group | Original           | MicroSprayer®      |
|------------|--------------------|--------------------|
| $10^1$     | $2.0 \times 10^2$  | $1 \times 10^2$    |
| $10^2$     | $2.3 \times 10^3$  | $2.0 \times 10^2$  |
| $10^3$     | $7.9 \times 10^3$  | $1.65 \times 10^3$ |
| $10^6$     | $4.40 \times 10^6$ | $3.80 \times 10^6$ |
| $10^7$     | $4.40 \times 10^7$ | $4.10 \times 10^7$ |
| $10^8$     | $4.80 \times 10^8$ | $4.10 \times 10^8$ |

139

#### 140 **Intratracheal inoculation with 16M *Brucella melitensis* results in systemic disease.**

141 Having established that the MicroSprayer® does not adversely affect bacterial viability,  
142 we next evaluated the ability of the device to inoculate guinea pigs with low doses ( $10^1$ ,  $10^2$ ,  $10^3$ )  
143 or high doses ( $10^6$ ,  $10^7$ ,  $10^8$ ) of *B. melitensis* 16M. After intratracheal inoculation with *B.*  
144 *melitensis*, guinea pigs were monitored for signs of clinical disease including fever, loss of  
145 appetite, respiratory disease (ocular discharge, increased respiratory effort), and lethargy.  
146 Brucellosis is a disease of high morbidity but low mortality and, as expected, intratracheal  
147 inoculation did not result in any deaths in any dose group despite evidence of systemic infection.  
148 However, guinea pigs in the  $10^8$  group had more severe clinical signs including roughened hair  
149 coat, ocular discharge, and lethargy. Body weight was not affected by infection in any dose  
150 group, and all guinea pigs continued to gain weight throughout the study period (data not  
151 shown). Guinea pigs inoculated with PBS or the low doses ( $10^1$ ,  $10^2$ ,  $10^3$ ) of *B. melitensis* did not  
152 develop fever or other clinical signs of brucellosis at any time point (data not shown). In the high  
153 dose groups, the onset of fever (temperature  $\geq 39.5^\circ\text{C}$ ) developed in a dose-dependent manner  
154 beginning at day 16 post-infection (Fig. 1). Approximately 75% of the animals in the  $10^6$  and  $10^7$   
155 groups developed fever with an undulant pattern. Based on the kinetics study, the earliest onset  
156 of fever appears to be 12-days post-inoculation (data not shown). The average daily temperature  
157 was significantly increased ( $P < 0.05$ ) in the  $10^6$  and  $10^7$  groups between days 16 to 24 compared

158 to the uninfected control group. The guinea pigs in the  $10^8$  group did not develop fever to the  
159 same level but 2 animals had a single episode of fever. We ascribe the lack of fever response in  
160 the  $10^8$  group to overwhelming disease that resulted in sepsis.

161 A hallmark of brucellosis in natural hosts and humans is splenomegaly. Previous aerosol  
162 studies with guinea pigs demonstrated the development of splenomegaly after infection [13]. In  
163 response to infection, spleen weight was significantly increased ( $p < 0.0001$ ) in the high dose  
164 group ( $10^6$ ,  $10^7$ ,  $10^8$ ) compared to the uninfected controls (Fig. 2A). The average spleen weight  
165 in the  $10^6$ ,  $10^7$ , and  $10^8$  group was 3.45 g, 2.96 g, and 3.33 g, respectively compared to 0.6 g in  
166 the control group. Spleen weight continuously increased over a four-week course of infection  
167 (Fig. 2B). While the liver is a frequent target of *B. melitensis*, infection is not associated with  
168 hepatomegaly in humans [14]. Similarly, the liver weight was not significantly different between  
169 dose groups or time points in guinea pigs (data not shown).

#### 170 **Guinea pigs infected with *B. melitensis* develop macroscopic and microscopic lesions.**

171 *Brucella* spp. have a tropism for tissues of the reticuloendothelial system and  
172 reproductive tract. To determine colonization following intratracheal inoculation, the spleen,  
173 liver, lung, cervical lymph node (CLN), tracheobronchial lymph node (TBLN) and uterus were  
174 collected for culture. Guinea pigs inoculated with either PBS or  $10^1$  and  $10^2$  CFU doses of *B.*  
175 *melitensis* did not result in colonization of any tissue examined. Animals in the  $10^3$  and high dose  
176 groups ( $10^6$ ,  $10^7$ ,  $10^8$ ) demonstrated dose-dependent mean increases in CFU recovered per gram  
177 of the spleen, liver, lung, cervical lymph node, tracheobronchial lymph node, and uterus at 30-  
178 days post-inoculation (Fig. 3A-F). Following intratracheal inoculation, bacteria are rapidly  
179 disseminated to the spleen, draining lymph nodes, and uterus within 2-hours post-inoculation and  
180 could be recovered from the lung, CLN, and TBLN in 100% of the animals (Fig. 4C-F). The

181 inoculum was evenly distributed throughout all lung lobes indicating that intratracheal  
182 inoculation generates a particle size that is able to reach the terminal airways (Fig. S1). Peak  
183 replication occurred at 3-weeks post-inoculation in the spleen, liver, and uterus (Fig. 4A,B,D).  
184 Replication continued to increase in the CLN and TBLN for the entire study period (Fig. 4E-F).

185         The earliest gross lesions developed 2-weeks post-inoculation and included nodular  
186 lymphoid hyperplasia in the spleen, perinodal hemorrhage around the CLN, multifocal random  
187 1-2 mm pale foci in the liver, and consolidation of the cranioventral lung lobes with multifocal 1-  
188 3 mm depressed gray foci scattered throughout the pulmonary parenchyma. A single animal in  
189 the  $10^7$  group had a splenic abscess. No gross or microscopic lesions consistent with brucellosis  
190 were observed in any organ in the PBS control,  $10^1$ , or  $10^2$  groups or at 2-hours post-inoculation.  
191 A grading system was developed to assess microscopic findings in the spleen, liver, lung, and  
192 uterus (Table S1). Application of the grading system demonstrated a significant increase  
193 ( $P<0.0001$ ) in lesion severity based on average histologic score as the dose increased between  
194 the uninfected controls and high dose groups.

195         Sections were graded by a board-certified veterinary pathologist (MH). Lesions in all  
196 organs in the high dose groups ( $10^6$ ,  $10^7$ ,  $10^8$ ) increased in number, size, and severity by 30-days  
197 post-inoculation in a dose dependent manner. Histologic evaluation of the spleen revealed an  
198 inflammatory infiltrate of predominantly epithelioid macrophages with fewer neutrophils that  
199 effaced the normal architecture (Fig. 5). Similarly, the earliest lesion at 1-week post-inoculation  
200 were small foci of epithelioid macrophages in the red pulp that increased in size and number at 2  
201 and 3-weeks post-inoculation. The cortex and medulla of the lymph node were also expanded by  
202 a large number of epithelioid macrophages (data not shown). The liver lesion was characterized  
203 by variably sized random foci of liquefactive and coagulative necrosis surrounded by



204 neutrophilic and histiocytic inflammation and multifocal random microgranulomas composed of  
205 accumulations of histiocytes (Fig. 6). Portal areas were expanded by lymphocytes and plasma  
206 cells. The range of morphologic diagnoses seen in the guinea pigs is similar to those described in  
207 the liver of people infected with *B. melitensis* including lymphocytic portal hepatitis and  
208 microgranulomas. In addition, guinea pigs had foci of necrosis surrounded by macrophages and  
209 neutrophils, which may be similar to the noncaseating granulomas described by Young [15]. The  
210 earliest lesion in the lung at 1-week post-inoculation included expansion of the bronchus-  
211 associated lymphoid tissue (BALT), congestion of the alveolar walls, and edema. By 2-weeks  
212 post-inoculation, alveolar walls were thickened by an inflammatory infiltrate of macrophages  
213 and neutrophils surrounded by lymphocytes and plasma cells. At 3 to 4-weeks, the inflammatory  
214 infiltrate had coalesced into variably sized nodules of histiocytic and neutrophilic inflammation  
215 (Fig. S2).

216 *Brucella* species have a known tropism for the reproductive tract. In the natural host  
217 (sheep and goats), *B. melitensis* causes midterm spontaneous abortion and fetal death [10].  
218 Lesions of the non-pregnant uterus have not been reported in the guinea pig model previously,  
219 and most reproductive studies have focused on pregnant animals. Interestingly, at 2-weeks post-  
220 inoculation, the endometrial stroma was variably expanded by edema, and endometrial glands  
221 were distended by an inflammatory infiltrate of intact and degenerate neutrophils and  
222 macrophages. The lesion progressed in severity and by 3 and 4-weeks post-inoculation, foci of  
223 histiocytic inflammation were developing in the myometrium (Fig. 7). A single animal in the  
224  $10^8$ -dose group had histiocytic salpingitis. No lesions were identified 1-week post-inoculation in  
225 the uterus.

226 To further support the CFU data that the lesions in the liver, spleen, and uterus were due  
227 to *Brucella* infection, IHC was performed to colocalize *Brucella* antigen within foci of  
228 inflammation. *Brucella* antigen was detected within epithelioid macrophages in the spleen, liver,  
229 and uterus by IHC further corroborating the etiology of the lesion (Fig. 5-7). Antigen was also  
230 detected intracellularly within macrophages in the lung (Fig. S2), CLN, and TBLN (data not  
231 shown).

### 232 **Infection stimulates a *Brucella*-specific IgG humoral immune response**

233 Guinea pigs develop a humoral response (anti-*Brucella* specific IgG) to infection with  
234 *Brucella melitensis* delivered via intratracheal inoculation. No change in IgG level was noted in  
235 the PBS,  $10^1$ , or  $10^2$  groups. Only guinea pigs in the high dose groups ( $10^6$ ,  $10^7$ ,  $10^8$ ) were  
236 capable of mounting a humoral response against *B. melitensis*. The increase in IgG level was  
237 statistically significant in the  $10^7$  and  $10^8$  groups at 4-weeks post-inoculation ( $P < 0.01$ ) (Fig 8).  
238 Levels of *Brucella*-specific IgG antibodies increased starting 1-week post-inoculation and  
239 increased throughout the study period (data not shown).

### 240 **Discussion**

241 *Brucella* organisms can be easily aerosolized and inhalation of bacteria is a major route  
242 of natural transmission in both animals and people [4]. One of the limitations to developing  
243 stronger intervention measures such as a safe and efficacious vaccine has been the difficulty of  
244 replicating natural disease in a laboratory animal model. Mice are the most commonly utilized  
245 animal, but limitations to this model include lack of fever response, relatively high dose required  
246 to generate systemic infection, and an artificial route of inoculation that does not mimic natural  
247 transmission events [6]. In contrast, guinea pigs develop key features of disease when inoculated  
248 via an aerosol route, which closely mimics the naturally occurring disease process [13, 16, 17].

249 Guinea pigs were used in the early twentieth century as the model of choice to evaluate the  
250 pathogenicity of *Brucella* species such as *B. abortus*, *B. suis*, and *B. melitensis* and could offer an  
251 improvement over the mouse model for vaccine and therapeutic development [10, 11, 13, 16-24].

252 The PennCentury™ MicroSprayer is a targeted means of generating aerosols and offers  
253 an improvement over aerosol chambers or aerosol devices like the Henderson apparatus because  
254 it allows for the direct inoculation of bacteria into the upper respiratory tract through the trachea.  
255 However, the MicroSprayer® Aerosolizer does bypass the nares, which would be a line of  
256 defense in the upper respiratory tract against natural transmission. Due to the guinea pig oral  
257 anatomy, the device is inserted into the proximal trachea at the level of the arytenoid cartilage.  
258 Microparticles are generated after passage through the MicroSprayer®, which then move by  
259 centripetal force through the trachea and into the lower airways. This is similar to the natural  
260 transmission in which inhaled particles must pass from the nares into the trachea and then into  
261 the bronchi and bronchioles. Particle size determines the site of deposition within the airway  
262 with larger particles (>15 µm) removed through the nares and sinuses while smaller particles (6-  
263 10 µm) deposit in the bronchi [25]. The smallest particle size (≤5 µm) are able to deposit in the  
264 terminal bronchioles and alveoli [25]. The MicroSprayer® generates a mean particle size of 8  
265 µm, which allows for the particles to be deposited in the lower airways [26].

266 Recurrent or undulant fever is a hallmark of brucellosis in humans and is a feature of  
267 disease that is not replicated in the mouse model [2]. The first study to document fever in guinea  
268 pigs used an intraperitoneal, intravenous, or subcutaneous route of inoculation. The severity of  
269 the temperature elevation was not reported, and it was further stated that fever developed in the  
270 acute stage of infection, described as 72 hours post-inoculation [11]. In people, the onset of  
271 clinical symptoms such as fever tend to be insidious but likely develop between 6 to 90 days

272 after exposure, and the temporality and undulant nature of the fever response suggests guinea  
273 pigs could be a biologically relevant model for future studies [4]. The aerosol literature with  
274 *Brucella* spp. in guinea pigs did not evaluate body temperature and thus it was previously  
275 unknown if aerosol inoculation would result in fever.

276 People can be infected with as few as 10-100 CFU of *Brucella* and thus this study  
277 evaluated the ability of low doses ( $10^1$ ,  $10^2$ ,  $10^3$ ) of *B. melitensis* 16M to infect guinea pigs [4]. A  
278 high dose range ( $10^6$ ,  $10^7$ ,  $10^8$ ) was also evaluated because many of the infectious aerosols that  
279 people are exposed to likely exceed the minimum dose estimated to generate infection [2, 4]. The  
280 dose titration study indicated a dose of at least  $10^6$  CFU was required to induce temperature  
281 elevations although systemic infection developed in the majority of the guinea pigs inoculated  
282 with  $10^3$  CFU. Previous aerosol studies in guinea pigs delivered a dose of between  $4.5 \times 10^3$ /ml to  
283  $5.0 \times 10^5$ /ml, which generated an estimated dose range of 48-2800 CFU [13, 16, 17, 27]. The  
284 majority of the early aerosol studies utilized the Henderson apparatus for generating aerosols,  
285 which is a mask that fits over the head and neck of the guinea pig to create a small aerosol  
286 chamber [13, 16, 17, 28]. As such, the guinea pigs were exposed not only through the respiratory  
287 tract, but bacteria were also likely deposited on mucous membranes of the conjunctiva and oral  
288 cavity and potentially ingested. The calculated dose did not account for these other potential  
289 routes of exposure, which could have increased the dose inoculated. Furthermore, since the doses  
290 from the earlier aerosol studies also based inoculation dose on calculations of ventilation rate and  
291 respiratory tidal volume of the guinea pig, the dose could have been underestimated [29]. The  
292 dose in this study is higher than the reported range required to induce infection in guinea pigs  
293 because we wanted to establish a model that replicated the features of human brucellosis like  
294 fever. The previous studies evaluated infection by colonization of organs such as the spleen and

295 liver, whereas this study used clinical parameters such as body temperature plus organ  
296 colonization to demonstrate infection.

297         While the respiratory tract is a common portal of entry, pulmonary pathology and  
298 respiratory disease are not atypical features of *Brucella* spp. infection [30, 31]. In the rare cases  
299 in which respiratory disease is reported, the common presentations include pneumonia,  
300 bronchopneumonia, pleural effusion, and dry coughing [31]. Respiratory signs rarely occur in  
301 isolation, and patients often have concomitant disease such as hepatitis or spondylitis supporting  
302 the role of the lung as a portal of entry rather than a primary target [30, 31]. Clinical signs in  
303 mice with respiratory infection have not been reported [7]. In the 10<sup>8</sup> group, two animals  
304 developed transient ocular discharge, which can be associated with respiratory disease in guinea  
305 pigs [32]. Guinea pigs had a pattern of cranioventral lung lobe consolidation and embolic foci,  
306 which suggests a dual pattern of infection. The initial inoculation with *B. melitensis* via  
307 intratracheal delivery likely leads to the development of cranioventral consolidation as the site of  
308 initial deposition followed by an embolic pattern as the animals become bacteremic. A previous  
309 aerosol study in guinea pigs by Elberg and Henderson reported no *Brucella*-specific macroscopic  
310 or microscopic pulmonary pathology, and several other contemporary studies failed to evaluate  
311 the lung for lesions [13, 16, 17].

312         *Brucella* has a tropism for organs of the reticuloendothelial system including the spleen,  
313 lymph nodes, and liver [2, 3, 14, 15]. Splenomegaly, lymphadenomegaly, and hepatitis are  
314 common macroscopic lesions in natural and experimental infection [3]. The microscopic splenic  
315 lesion has not been well described in the medical literature but has been described as congestion,  
316 lymphoid hyperplasia, and histiocytic splenitis in mice [6]. Guinea pigs develop splenic  
317 congestion and lymphoid hyperplasia with occasional necrosis and abscesses thirty days after

318 receiving an aerosol dose of  $2.16 \times 10^3$  CFU of *B. abortus* and *B. melitensis* [13].  
319 Lymphadenomegaly is another well documented sequelae of infection with *Brucella* spp. in both  
320 people and guinea pigs [13, 15-17]. An aerosol study by Elberg and Henderson noted the  
321 development of caseous abscesses in the cervical and tracheobronchial lymph nodes; however,  
322 *Brucella* was not cultured from the nodes so the etiology of the abscess cannot be definitively  
323 assigned to brucellosis [13]. The final reticuloendothelial organ that is commonly affected during  
324 infection is the liver. A prospective study of patients with hepatitis due to *B. melitensis* found  
325 that disease is often subclinical but can cause mild derangements in hepatic enzymes such as  
326 alanine aminotransferase (ALT)[14]. The acute lesion of brucellosis is described most frequently  
327 as lymphocytic portal to lobular inflammation with fewer cases diagnosed with noncaseating  
328 granulomas or microgranulomas [14]. The literature describes “granulomata” in the guinea pig  
329 liver following aerosol inoculation but do not provide further histologic description [13].

330 *Brucella* spp. are best known as pathogens of the reproductive tract during pregnancy and  
331 cause a range of adverse events such as abortion, stillbirths, and infertility in small ruminants and  
332 people [2, 33]. Less is known about the tropism of *Brucella* organisms for the non-gravid uterus.  
333 Reproductive studies in mouse models have not reported lesions in non-pregnant female  
334 reproductive organs. Researchers in the early twentieth century did not identify lesions in the  
335 reproductive tract of female guinea pigs and thus it was assumed that females were not an  
336 appropriate animal model for use in reproductive pathogenesis investigations. Instead, the early  
337 studies focused on male guinea pigs and identified orchitis, epididymitis, and peri-orchitis  
338 subsequent to intraperitoneal, intratesticular, and aerosol inoculation [10, 11, 22, 24, 34].  
339 However, a study from 1974 demonstrated that when pregnant guinea pigs are inoculated at mid-  
340 gestation with  $10^5$  *B. abortus* 2308 via intramuscular injection, stillbirths, abortions, and vertical

341 transmission occur. Thus, guinea pigs may be suitable models for future investigations into the  
342 pathogenesis and tropism of *Brucella* spp. for the gravid uterus.

343 This study describes pathologic changes of the non-gravid uterus, broadens the  
344 knowledge of *Brucella* as a pathogen of the reproductive tract, and suggests that pregnancy is not  
345 required to generate tropism. Since infertility is also described in non-pregnant women infected  
346 with *Brucella* spp., it is possible that inflammation of the reproductive tract is a contributing  
347 factor [33]. Intratracheal inoculation of the guinea pig offers an intriguing model for the study of  
348 the host-pathogen interaction that leads to reproductive disease in addition to providing a reliable  
349 means of generating systemic and clinical brucellosis that could be used to evaluate vaccine  
350 candidates.

## 351 **Methods**

### 352 **Ethics statement**

353 This study includes the use of guinea pigs. This study was carried out in an approved facility in  
354 strict accordance with all university and federal regulations. All guinea pig experimentation was  
355 reviewed and approved by the Texas A&M University Laboratory Animal Care and Use  
356 Committee (protocol: 2015-0036). The protocol was approved and is in accordance with the  
357 Institutional Animal Care and Use Committee (IACUC) policies of Texas A&M University.  
358 Texas A&M is accredited by the Association for the Assessment and Accreditation of  
359 Laboratory Animal Care, International (AAALAC).

### 360 **Animal husbandry**

361 Outbred Harley female guinea pigs (n=44) weighing approximately 300-350 g were obtained  
362 from Charles River Laboratories and housed in microisolator caging in a biosafety level three  
363 facility. Guinea pigs were acclimated to the facility for 5 days prior to infection and were on a

364 12-hour—12-hour light-dark cycle with ad libitum access to pelleted food, Timothy hay, and  
365 water. A modified Karnofsky performance status scoring system was used to evaluate the guinea  
366 pigs daily to determine if early removal from the study was required.

### 367 **Bacteriology**

368 *Brucella melitensis* 16M wild-type strain, originally acquired from an aborted goat fetus, was  
369 routinely grown on tryptic soy agar (TSA) (Difco Laboratories) at 37°C in an atmosphere  
370 containing 5% (vol/vol) CO<sub>2</sub> for 72 hours [35]. Bacteria were harvested into phosphate-buffered  
371 saline (PBS) (pH 7.4; Gibco) to obtain the final concentration needed for each experiment, as  
372 estimated turbidometrically using a Klett meter. Serial dilution was performed to accurately  
373 determine the number of organisms in the inoculum. To determine if passage through the  
374 MicroSprayer® affected the inoculum dose, 100 µl of the inoculum was passed through the  
375 MicroSprayer® and collected in the microcentrifuge tube containing 900 µl PBS for serial  
376 dilution and culture on TSA.

### 377 **Dose titration**

378 Guinea pigs were divided in 7 groups (n=4) and were further subdivided into low dose (10<sup>1</sup>,  
379 10<sup>2</sup>,10<sup>3</sup>), high dose (10<sup>6</sup>, 10<sup>7</sup>, 10<sup>8</sup>), or control (PBS) groups. Guinea pigs were anesthetized with  
380 ketamine/xylazine (50mg/kg;5mg/kg) and a subcutaneous IPTT-300 microchip was placed to  
381 monitor temperature throughout the study (Bio Medic Data Systems). The 50 µl doses of *B.*  
382 *melitensis* 16M were prepared from cultures resuspended into PBS and serially diluted to obtain  
383 the dose groups. The inoculum was administered into the proximal trachea and lungs using the  
384 PennCentury™ MicroSprayer I-1C device (Penn Century Inc.). Animals were monitored daily  
385 for 30 days for changes in body temperature, respiratory pattern and effort, and weight.  
386 Temperatures of ≥39.5°C were defined as fever. At 30-days post-inoculation, animals were



387 euthanized by intraperitoneal injection of sodium pentobarbitol (Beuthanasia) followed by  
388 cardiac exsanguination. Samples of lung, liver, spleen, cervical lymph node, tracheobronchial  
389 lymph node, and uterus were aseptically collected into 1 ml PBS, homogenized, serially diluted,  
390 and 100  $\mu$ l of each dilution was plated in duplicate onto Farrell's medium (TSA plus *Brucella*  
391 Oxoid supplement, equine serum, and 50% dextrose) and incubated at 37°C in an atmosphere  
392 containing 5% (vol/vol) CO<sub>2</sub> [7]. Bacterial colonies were enumerated after 72 hours to quantify  
393 tissue colonization. Spleen and liver were weighed at necropsy, and the aforementioned tissues  
394 were collected and fixed in 10% neutral buffered formalin for evaluation by light microscopy.

#### 395 **Kinetics of infection**

396 Guinea pigs were divided into four groups (n=4) and were infected via intratracheal inoculation  
397 with 50  $\mu$ l of  $1 \times 10^7$  CFU *B. melitensis*. The endpoints were 2-hours post-inoculation and at  
398 weekly intervals thereafter for three weeks. To determine the actual number of infectious  
399 organisms delivered by intratracheal inoculation, 4 animals were euthanized 2-hours post-  
400 inoculation, and the lung was divided into four quarters (left and right, cranial and caudal),  
401 collected into 1 ml PBS, homogenized, and serial dilutions plated on Farrell's medium. Spleen,  
402 liver, CLN, TBLN, and uterus were collected for culture and histology at each of the time points,  
403 as described in experiment 1.

#### 404 **Histopathology**

405 Spleen, liver, lung, uterus, CLN, and TBLN were collected at necropsy and fixed in 10% neutral  
406 buffered formalin for a minimum of 48 h. Tissues were routinely processed and embedded,  
407 sectioned at 5  $\mu$ m, and stained with hematoxylin and eosin. Sections from spleen, liver, lung, and  
408 uterus were graded in a blinded fashion by a board-certified veterinary pathologist (MH) on a

409 scale of 0-4 for inflammation type, necrosis, and severity (S1). The mean total score for each  
410 tissue was compared between groups.

#### 411 **Immunohistochemistry**

412 Unstained slides from spleen, uterus, liver, and lung were adhered to positively charged glass  
413 slides for immunohistochemistry. Slides were deparaffinized and rehydrated through a series of  
414 xylene and ethanol steps before antigen retrieval was performed using 1:10 EMS Solution A  
415 (Electron Microscopy Services) in a 2100 Antigen Retriever (Aptum Biologics Ltd.), according  
416 to manufacturer protocol. Endogenous peroxidases were blocked by 10 m incubation with  
417 Bloxall Blocking Solution (Vector Laboratories) followed by 20 m blocking with normal goat  
418 serum (Vector). After each step slides were washed with PBS plus 0.5% tween for 5 minutes.  
419 Primary incubation was overnight at 4° C with *Brucella* polyclonal rabbit antibody (Bioss) at  
420 1:600. Negative control tissues were incubated with rabbit nonimmune serum diluted in PBS. A  
421 Vectastain ABC and Betazoid DAB chromagen kits (Biocare Medical) were used following  
422 primary incubation according to the manufacturer's instructions. The slides were counterstained  
423 with Meyer's hematoxylin III.

#### 424 **Anti-*Brucella* specific IgG ELISA**

425 300 µl of blood was collected into serum separator tubes from the lateral saphenous vein at day  
426 14 and from the heart at day 28 following euthanasia. Blood was centrifuged at 3000 rpm for 5  
427 minutes, and the serum was collected for anti-*Brucella* specific immunoglobulin G (IgG) indirect  
428 enzyme linked immunosorbent assay (iELISA). 96 well plates were pre-coated with 25 µg/well  
429 of *Brucella abortus* 2308 heat killed lysate and held overnight at 4°C. Plates were washed three  
430 times and then blocked with 3% skim milk (Sigma) for 2 hours at room temperature. Guinea pig  
431 sera samples were diluted in blocking buffer (0.25% [wt/vol] bovine serum albumin) to 1:1000

432 and incubated at 37°C for 1 h. Plates were washed five times and then peroxidase labeled goat  
433 anti-guinea pig IgG (KPL) was added at 1:2000, followed by incubation at 37°C for 1 hour. After  
434 a final washing step, horseradish peroxidase substrate (Sigma) was added and plates were  
435 protected from light and incubated for 30 m at 37°C. Absorbance was measured at 450 nm. All  
436 assays were performed in triplicate, and the results are presented as the mean value for the three  
437 wells.

#### 438 **Statistical analysis**

439 Analysis was performed using the GraphPad Prism 6.0 Software. The difference between group  
440 means was analyzed using a one-way analysis of variance (ANOVA) repeated-measures test, and  
441 Dunnett's multiple comparisons was used to generate *P* values for selected mean comparisons.  
442 Tukey's multiple comparison was used to generate *P* values to compare mean IgG values.

#### 443 **Acknowledgements**

444 We thank Anthony Gregory and Erin J. van Schaik for technical guidance and support.

445

- 446 1. Whatmore AM, Koylass MS, Muchowski J, Edwards-Smallbone J, Gopaul KK, Perrett LL.  
447 Extended Multilocus Sequence Analysis to Describe the Global Population Structure of the  
448 Genus *Brucella*: Phylogeography and Relationship to Biovars. *Frontiers in Microbiology*.  
449 2016;7:2049. doi: 10.3389/fmicb.2016.02049. PubMed PMID: PMC5174110.
- 450 2. Corbel MJ. *Brucellosis in Humans and Animals*. Geneva, Switzerland: World Health  
451 Organization, 2006.
- 452 3. Young EJ. An overview of human brucellosis. *Clinical infectious diseases : an official*  
453 *publication of the Infectious Diseases Society of America*. 1995;21(2):283-9; quiz 90. Epub  
454 1995/08/01. PubMed PMID: 8562733.
- 455 4. Pappas G, Panagopoulou P, Christou L, Akritidis N. Biological weapons. *Cellular and*  
456 *Molecular Life Sciences CMLS*. 2006;63(19):2229-36. doi: 10.1007/s00018-006-6311-4.
- 457 5. Silva TM, Costa EA, Paixao TA, Tsolis RM, Santos RL. Laboratory animal models for  
458 brucellosis research. *Journal of biomedicine & biotechnology*. 2011;2011:518323. Epub  
459 2011/03/16. doi: 10.1155/2011/518323. PubMed PMID: 21403904; PubMed Central PMCID:  
460 PMC3043301.
- 461 6. Grillo MJ, Blasco JM, Gorvel JP, Moriyon I, Moreno E. What have we learned from  
462 brucellosis in the mouse model? *Vet Res*. 2012;43:29. doi: 10.1186/1297-9716-43-29. PubMed  
463 PMID: 22500859; PubMed Central PMCID: PMC3410789.

- 464 7. Kahl-McDonagh MM, Arenas-Gamboa AM, Ficht TA. Aerosol infection of BALB/c mice  
465 with *Brucella melitensis* and *Brucella abortus* and protective efficacy against aerosol challenge.  
466 *Infection and immunity*. 2007;75(10):4923-32. Epub 2007/08/01. doi: 10.1128/iai.00451-07.  
467 PubMed PMID: 17664263; PubMed Central PMCID: PMC2044518.
- 468 8. Fabyan M. A Contribution to the Pathogenesis of *B. Abortus*, Bang.-II. *J Med Res*.  
469 1912;26(3):441-88 13. Epub 1912/07/01. PubMed PMID: 19972062; PubMed Central PMCID:  
470 PMCPMC2099091.
- 471 9. García-Carrillo C. Laboratory animal models for brucellosis studies. Boca Raton, FL: CRC  
472 Press; 1990.
- 473 10. Huddleson IF. Brucellosis in man and animals. New York: The Commonwealth Fund; 1943.
- 474 11. Meyer KF, Shaw EB, Fleischner EC. The Pathogenicity of *B. melitensis* and *B. abortus* for  
475 Guinea-Pigs: Studies on the Genus *Brucella* Nov. Gen. IV. *The Journal of infectious diseases*.  
476 1922;31(2):159-97.
- 477 12. Lafontaine ER, Zimmerman SM, Shaffer TL, Michel F, Gao X, Hogan RJ. Use of a safe,  
478 reproducible, and rapid aerosol delivery method to study infection by *Burkholderia pseudomallei*  
479 and *Burkholderia mallei* in mice. *PloS one*. 2013;8(10):e76804. Epub 2013/10/08. doi:  
480 10.1371/journal.pone.0076804. PubMed PMID: 24098563; PubMed Central PMCID:  
481 PMCPMC3788738.
- 482 13. Elberg SS, Henderson DW. Respiratory Pathogenicity of *Brucella*. *The Journal of infectious*  
483 *diseases*. 1948;82(3):302-6.
- 484 14. Young EJ, Hasanjani Roushan MR, Shafae S, Genta RM, Taylor SL. Liver histology of acute  
485 brucellosis caused by *Brucella melitensis*. *Hum Pathol*. 2014;45(10):2023-8. doi:  
486 10.1016/j.humphath.2014.07.007. PubMed PMID: 25147098.
- 487 15. Young EJ. Human brucellosis. *Rev Infect Dis*. 1983;5(5):821-42. PubMed PMID: 6356268.
- 488 16. Harper GJ. *Brucella suis* infection of guinea-pigs by the respiratory route. *Br J Exp Pathol*.  
489 1955;36(1):60-70. Epub 1955/02/01. PubMed PMID: 14351638; PubMed Central PMCID:  
490 PMCPMC2082507.
- 491 17. Druett HA, Henderson DW, Peacock S. Studies on respiratory infection. III. Experiments  
492 with *Brucella suis*. *J Hyg (Lond)*. 1956;54(1):49-57. PubMed PMID: 13319690; PubMed Central  
493 PMCID: PMC2218001.
- 494 18. Smillie EW. An improvement in the method of isolating and recovering the bacillus of cattle  
495 abortion through guinea pigs. *The Journal of Experimental Medicine*. 1918;28(5):585.
- 496 19. Smith T. The relation of *Bacillus abortus* from bovine sources to Malta fever. *The Journal of*  
497 *Experimental Medicine*. 1926;43(2):207.
- 498 20. Huddleson IFH, E. T. The Pathogenicity of the Species of the Genus *Brucella* for Monkeys.  
499 *The Journal of infectious diseases*. 1929;45(4):293-303.
- 500 21. Braude AI. Studies in the pathology and pathogenesis of experimental brucellosis. II. The  
501 formation of the hepatic granuloma and its evolution. *The Journal of infectious diseases*.  
502 1951;89(1):87-94. Epub 1951/07/01. PubMed PMID: 14861465.
- 503 22. Braude AI. Studies in the pathology and pathogenesis of experimental brucellosis. I. A  
504 comparison of the pathogenicity of *Brucella abortus*, *Brucella melitensis*, and *Brucella suis* for  
505 guinea pigs. *The Journal of infectious diseases*. 1951;89(1):76-86. PubMed PMID: 14861464.
- 506 23. Braude AI, Spink WW. Studies in the pathology and pathogenesis of experimental  
507 brucellosis. III. Investigations pertaining to the function of the spleen. *The Journal of infectious*  
508 *diseases*. 1951;89(3):272-6. PubMed PMID: 14888952.

- 509 24. Moulton JE, Meyer ME. The pathogenesis of *Brucella suis* infection in guinea pigs: lesions  
510 of the spleen, liver, testis, and articulations. *The Cornell veterinarian*. 1958;48(2):165-95. Epub  
511 1958/04/01. PubMed PMID: 13537582.
- 512 25. Lippmann M, Albert RE. The Effect of Particle Size on the Regional Deposition of Inhaled  
513 Aerosols in the Human Respiratory Tract. *American Industrial Hygiene Association Journal*.  
514 1969;30(3):257-75. doi: 10.1080/00028896909343120.
- 515 26. Bivas-Benita M, Zwier R, Junginger HE, Borchard G. Non-invasive pulmonary aerosol  
516 delivery in mice by the endotracheal route. *European Journal of Pharmaceutics and*  
517 *Biopharmaceutics*. 2005;61(3):214-8. doi: <https://doi.org/10.1016/j.ejpb.2005.04.009>.
- 518 27. Phillips GB, Broadwater GC, Reitman M, Alg RL. Cross infections among *Brucella* infected  
519 guinea pigs. *The Journal of infectious diseases*. 1956;99(1):56-9. PubMed PMID: 13357772.
- 520 28. Henderson DW. An apparatus for the study of airborne infection. *J Hyg (Lond)*.  
521 1952;50(1):53-68. PubMed PMID: 14908062; PubMed Central PMCID: PMCPMC2235137.
- 522 29. Cascio A, Caridi Gd, Lentini S, Benedetto F, Stilo F, Passari G, et al. Involvement of the  
523 aorta in brucellosis: the forgotten, life-threatening complication. a systematic review. *Vector*  
524 *Borne and Zoonotic Diseases*. 2012;12(10):827-40. many ref.
- 525 30. Erdem H, Inan A, Elaldi N, Tekin R, Gulsun S, Ataman-Hatipoglu C, et al. Respiratory  
526 system involvement in brucellosis: the results of the Kardelen study. *Chest*. 2014;145(1):87-94.  
527 Epub 2013/08/03. doi: 10.1378/chest.13-0240. PubMed PMID: 23907372.
- 528 31. Pappas G, Bosilkovski M, Akritidis N, Mastora M, Krteva L, Tsianos E. Brucellosis and the  
529 respiratory system. *Clinical infectious diseases : an official publication of the Infectious Diseases*  
530 *Society of America*. 2003;37(7):e95-9. Epub 2003/09/18. doi: 10.1086/378125. PubMed PMID:  
531 13130417.
- 532 32. Yarto-Jaramillo E. Respiratory system anatomy, physiology, and disease: Guinea pigs and  
533 chinchillas. *Vet Clin North Am Exot Anim Pract*. 2011;14(2):339-55, vi. Epub 2011/05/24. doi:  
534 10.1016/j.cvex.2011.03.008. PubMed PMID: 21601817.
- 535 33. Arenas-Gamboa AM, Rossetti CA, Chaki SP, Garcia-Gonzalez DG, Adams LG, Ficht TA.  
536 Human Brucellosis and Adverse Pregnancy Outcomes. *Current Tropical Medicine Reports*.  
537 2016:1-9. doi: 10.1007/s40475-016-0092-0.
- 538 34. Cuba-Caparo A, Myers DM. Pathogenesis of epididymitis caused by *Brucella ovis* in  
539 laboratory animals. *Am J Vet Res*. 1973;34(8):1077-85. PubMed PMID: 4755775.
- 540 35. Kahl-McDonagh MM, Elzer PH, Hagius SD, Walker JV, Perry QL, Seabury CM, et al.  
541 Evaluation of novel *Brucella melitensis* unmarked deletion mutants for safety and efficacy in the  
542 goat model of brucellosis. *Vaccine*. 2006;24(24):5169-77. Epub 2006/05/16. doi:  
543 10.1016/j.vaccine.2006.04.005. PubMed PMID: 16697090.

544  
545 **Table 1. Bacterial viability following passage through the MicroSprayer® Aerosolizer.**

546 **Figure 1. Body temperature changes in guinea pigs after intratracheal inoculation PBS,**

547 **10<sup>6</sup>, 10<sup>7</sup>, and 10<sup>8</sup> *B. melitensis* 16M.**

548 Guinea pigs were inoculated using the MicroSprayer® Aerosolizer with low dose (10<sup>1</sup>, 10<sup>2</sup>,10<sup>3</sup>),

549 high dose (10<sup>6</sup>, 10<sup>7</sup>, 10<sup>8</sup>), or control (PBS) groups. Body temperature was monitored daily using

550 an implantable subcutaneous IPTT-300 microchip. The solid line at 39.5° C indicates the  
551 threshold for fever. Guinea pigs in the 10<sup>6</sup> and 10<sup>7</sup> groups developed fever with an undulant  
552 pattern.

553 **Figure 2. Splenic weights in guinea pigs inoculated with *B. melitensis* 16M or PBS.**

554 Splenomegaly was induced by high doses (10<sup>6</sup>, 10<sup>7</sup>, 10<sup>8</sup>) of *B. melitensis* by 30-days post-  
555 inoculation (A). Splenomegaly was detected as early as 2-weeks post-inoculation and increased  
556 through the study period (B). Data bars represent the mean spleen weight plus the standard  
557 deviation for all guinea pigs in each dose group. Mean spleen weight from each dose group (n=4)  
558 or time point (n=4) was compared to mean spleen weight of the uninfected control guinea pigs  
559 (n=3) and statistical significance was determined by ANOVA followed by Dunnett's multiple-  
560 comparison test. Three asterisks,  $P < 0.001$ . Four asterisks,  $P < 0.0001$ .

561 **Figure 3. Intratracheal inoculation with *B. melitensis* 16M in female Hartley guinea pigs  
562 results in systemic infection.**

563 Guinea pigs were divided in 7 groups (n=4) consisting of low dose (10<sup>1</sup>, 10<sup>2</sup>, 10<sup>3</sup>), high dose (10<sup>6</sup>,  
564 10<sup>7</sup>, 10<sup>8</sup>), or control (PBS) groups. Guinea pigs were inoculated using the MicroSprayer®  
565 Aerosolizer and were euthanized 30-days post-inoculation. Colonization was evaluated in the  
566 spleen (A), liver (B), lung (C), uterus (D), cervical lymph node (E), and tracheobronchial lymph  
567 node (F). The recovery of organisms is plotted as the total CFU/g (means ± standard deviation).  
568 Mean recovery per gram of tissue was compared between dose groups and uninfected control  
569 guinea pigs. Statistical significance was determined by ANOVA followed by Dunnett's multiple  
570 comparisons. One asterisk,  $P < 0.05$ . Two asterisks,  $P < 0.01$ . Three asterisks,  $P < 0.001$ . Four  
571 asterisks,  $P < 0.0001$ .

572 **Figure 4. Kinetics of systemic infection of *B. melitensis* 16M in guinea pigs infected via**  
573 **intratracheal inoculation.**

574 Four female Hartley guinea pigs per time point group were inoculated intratracheally with  $1 \times 10^7$   
575 CFU/50  $\mu$ l. The initial lung colonization was evaluated 2-hours post-inoculation to determine the  
576 inhaled dose. Guinea pigs (n=4) were euthanized at 1,2,3, and 4-weeks post-inoculation to  
577 determine the numbers of *B. melitensis* in the spleen (A), liver (B), lung (C), uterus (D), cervical  
578 lymph node (E), and tracheobronchial lymph node (F). Mean recovery per gram of tissue was  
579 compared between time points and uninfected control guinea pigs. Statistical significance was  
580 determined by ANOVA followed by Dunnett's multiple comparisons. One asterisk,  $P < 0.05$ .  
581 Two asterisks,  $P < 0.01$ . Three asterisks,  $P < 0.001$ . Four asterisks,  $P < 0.0001$ .

582 **Figure 5. Spleen histopathology.**

583 Representative images of histopathology and immunohistochemistry of the spleen following  
584 intratracheal inoculation with PBS (top), *B. melitensis* 16M at low dose (middle), or high dose  
585 (bottom) at 30-days post-inoculation (A). Sections were scored for severity from 1-4 (Table S1)  
586 based on accumulation of epithelioid macrophages, neutrophils, and necrosis (B). Infection with  
587 *B. melitensis* induces accumulation of epithelioid macrophages (\*). *Brucella* antigen was  
588 detected within epithelioid macrophages by immunohistochemistry (arrows). Magnification 4x  
589 (left, H&E, bar= 200  $\mu$ m), 20x (middle, H&E, bar= 50  $\mu$ m), 40x (right, Anti-*Brucella* IHC,  
590 bar=20  $\mu$ m).

591 **Figure 6. Liver histopathology.**

592 Representative images of histopathology and immunohistochemistry of the liver following  
593 intratracheal inoculation with PBS (top), *B. melitensis* 16M at low dose (middle), high dose  
594 (bottom) at 30-days post-inoculation. Sections were scored for severity from 1-4 (Table S1)

595 based periportal inflammation, number and size of microgranulomas and necrosis. Foci of  
596 necrosis were seen in the low and high dose groups (arrowheads), but the lesions were larger in  
597 the high dose group. *Brucella* antigen was detected within necrotic hepatocytes and macrophages  
598 in areas of necrosis by IHC (arrows). Magnification 4x (left, H&E, bar= 200  $\mu$ m), 20x (middle,  
599 H&E, bar= 50  $\mu$ m), 40x (right, Anti-*Brucella* IHC, bar=20  $\mu$ m).

#### 600 **Figure 7. Uterine histopathology.**

601 Representative images of histopathology and immunohistochemistry of the uterus following  
602 intratracheal inoculation with PBS (top), *B. melitensis* 16M at low dose (middle), or high dose  
603 (bottom) at 30-days post-inoculation. Sections were scored for severity from 1-4 (Table S1)  
604 based on edema, endometrial neutrophilic inflammation, and myometrial inflammation. The high  
605 dose group had increased numbers of neutrophils in the endometrium, foci of histiocytic  
606 inflammation within the myometrium (\*), and *Brucella* antigen was detected intracellularly via  
607 IHC (arrows). Magnification 4x (left, H&E, bar= 200  $\mu$ m), 20x (middle, H&E, bar= 50  $\mu$ m), 40x  
608 (right, Anti-*Brucella* IHC, bar=20  $\mu$ m).

#### 609 **Figure 8. Humoral response to intratracheal inoculation with *B. melitensis*.**

610 Anti-*Brucella* specific IgG ELISA with sera from guinea pigs inoculated by intratracheal route  
611 with *B. melitensis* 16M at doses of  $10^3$ ,  $10^6$ ,  $10^7$ ,  $10^8$ , or uninfected control (A) at day 0, 14, and  
612 30 post-inoculation. Guinea pigs in the  $10^7$  and  $10^8$  groups developed a statistically significant  
613 humoral response to inoculation with *B. melitensis*. The results are expressed as the mean  
614 absorbance per group ( $\pm$  standard error). Statistical significance was determined by ANOVA  
615 followed by Dunnett's multiple-comparison of each group (n=4) to the uninfected controls (n=3).  
616 Two asterisks,  $P < 0.01$ .

#### 617 **Supporting Information Legends**



618 **Supplemental Table 1 Grading criteria for histopathology**

619 Spleen, liver, uterus, and lung were graded according to inflammation and lesion severity.

620 **S1 Fig Distribution of aerosol particles following intratracheal inoculation.**

621 Intratracheal inoculation results in even distribution of aerosolized particles throughout all lung  
622 fields. The distribution of aerosolized *B. melitensis* 16M in the lung lobes of guinea pigs  
623 inoculated with  $1 \times 10^7$  CFU/50  $\mu$ l was evaluated at 2-hours and 1,2, and 3-weeks post-  
624 inoculation. The lung was divided into four regions defined as left, right, cranial, and caudal, and  
625 tissue colonization was determined by region. The horizontal bar is the mean per group with  
626 standard error.

627 **S2 Fig Pulmonary histopathology.**

628 Representative images of histopathology and immunohistochemistry of the lung following  
629 intratracheal inoculation with PBS (top), *B. melitensis* 16M at low dose (middle), high dose  
630 (bottom) at 30-days post-inoculation. Sections were scored for severity from 1-4 (Table S1)  
631 based neutrophilic inflammation, number and size of microgranulomas and necrosis, and  
632 bronchoalveolar hyperplasia. Foci of histiocytic inflammation were seen in the low and high  
633 dose groups (arrowheads), but the lesions were larger in the high dose group. *Brucella* antigen  
634 was detected within alveolar macrophages in areas of inflammation by IHC (arrows).  
635 Magnification 4x (left, H&E, bar= 200  $\mu$ m), 20x (middle, H&E, bar= 50  $\mu$ m), 40x (right, Anti-  
636 *Brucella* IHC, bar=20  $\mu$ m).

637  
638

bioRxiv preprint doi: <https://doi.org/10.1101/457184>; this version posted October 30, 2019. The copyright holder for this preprint (which was not certified by peer review) is the author/funder, who has granted bioRxiv a license to display the preprint in perpetuity. It is made available under aCC-BY 4.0 International license.

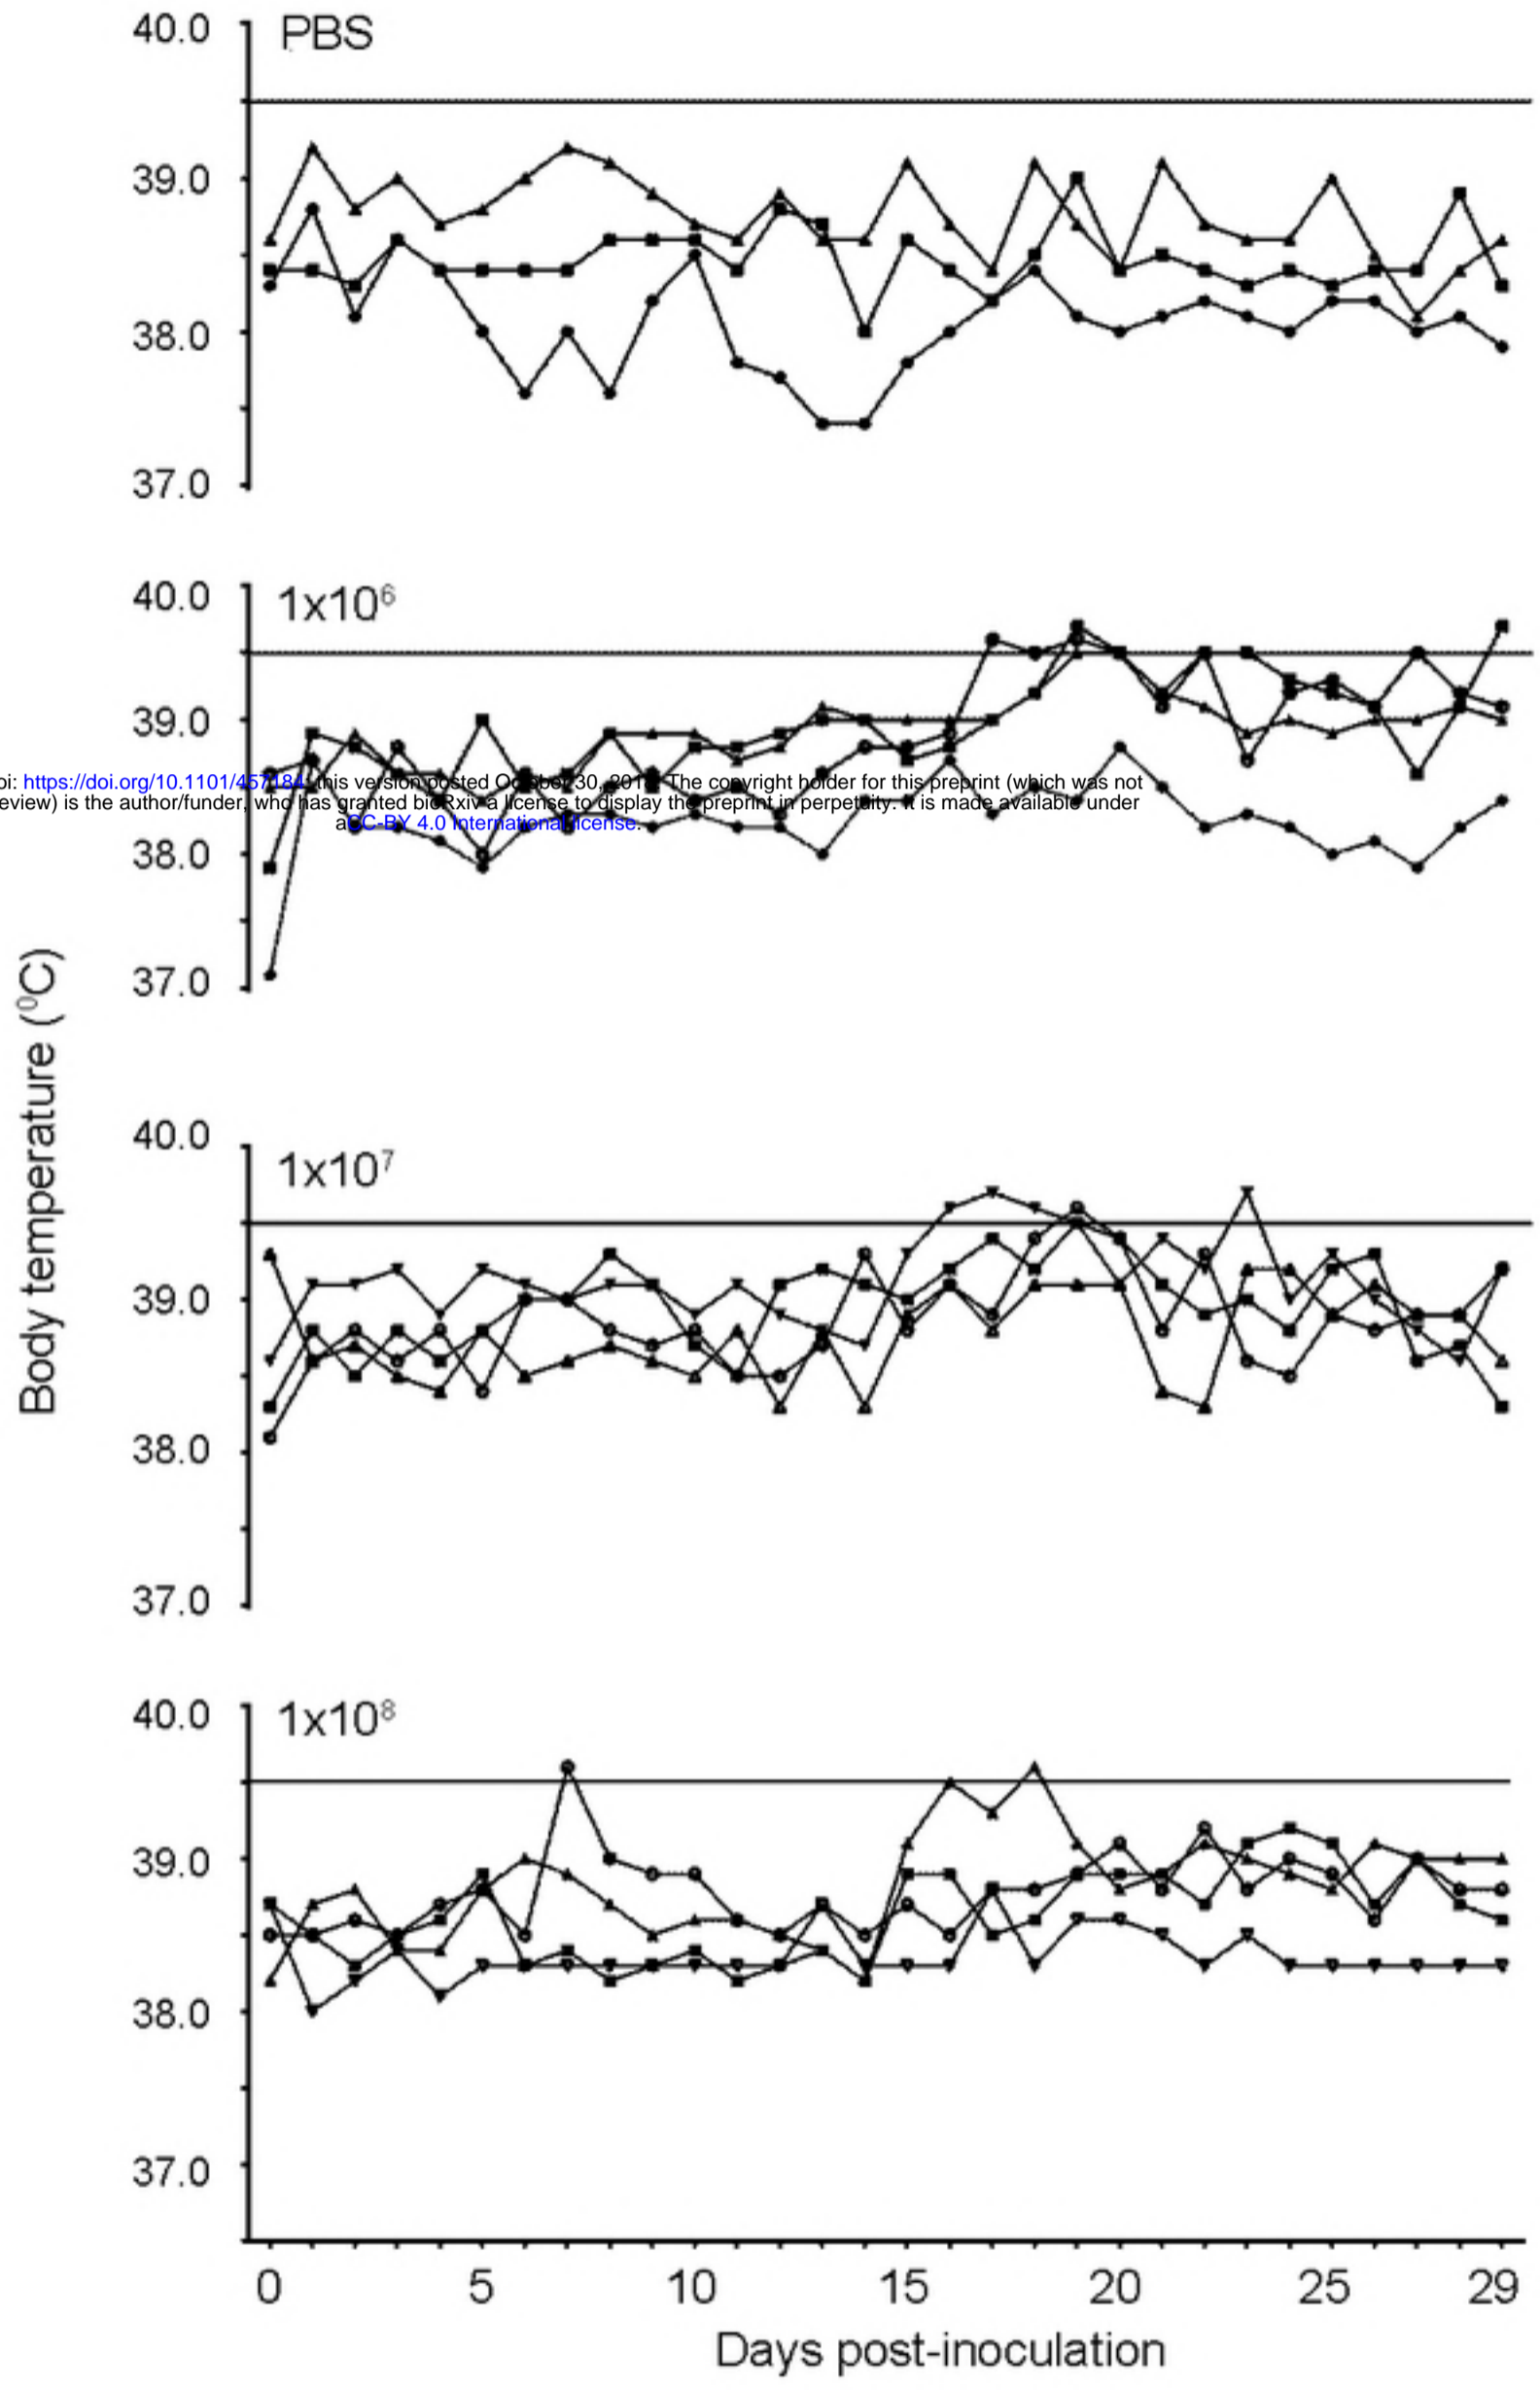

Figure 1

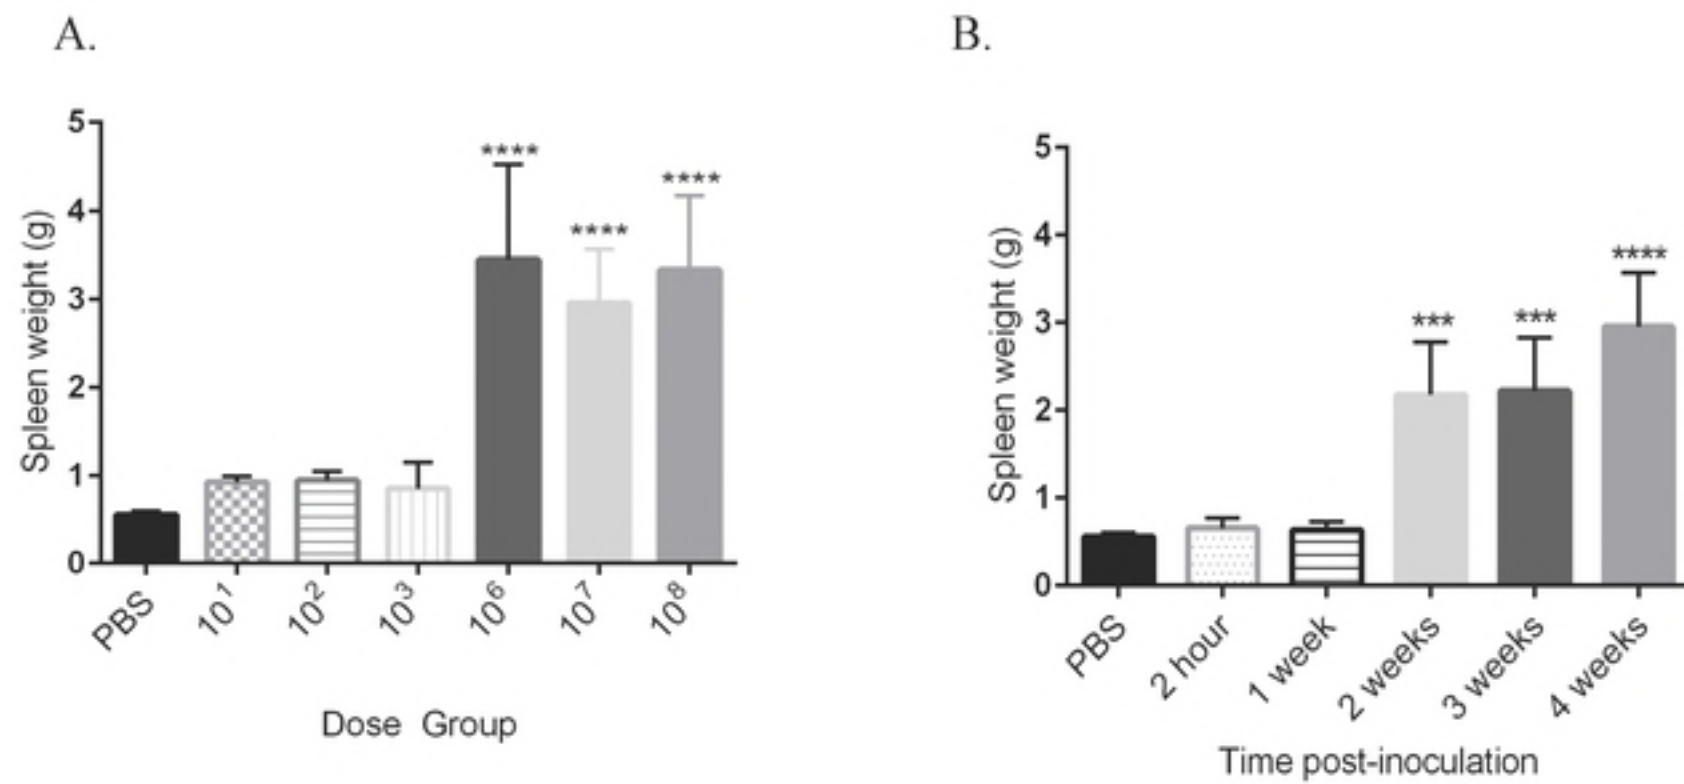

**FIG 2** Splenic weights in guinea pigs inoculated with of *B. melitensis* 16M. Splenomegaly was

bioRxiv preprint doi: <https://doi.org/10.1101/457184>; this version posted October 30, 2018. The copyright holder for this preprint (which was not certified by peer review) is the author/funder, who has granted bioRxiv a license to display the preprint in perpetuity. It is made available under aCC-BY 4.0 International license.

induced by high doses ( $10^6$ ,  $10^7$ ,  $10^8$ ) of *B. melitensis* by 30-days post-inoculation (A).

Splenomegaly was detected as early as 2-weeks post-inoculation and increased through the study period (B). Data bars represent the mean spleen weight plus the standard error for all guinea pigs in each dose group. Mean spleen weight from each dose group (n=4) or time point (n=4) was compared to mean spleen weight of the uninfected control guinea pigs (n=3) and statistical significance was determined by ANOVA followed by Dunnett's multiple-comparison test. Three asterisks,  $P < 0.001$ . Four asterisks,  $P < 0.0001$ .

### A. Spleen

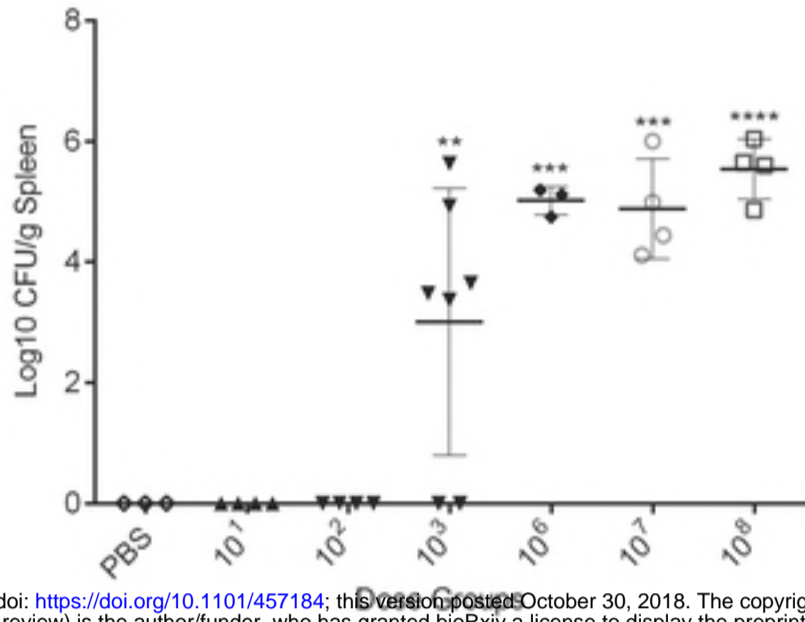

### B. Liver

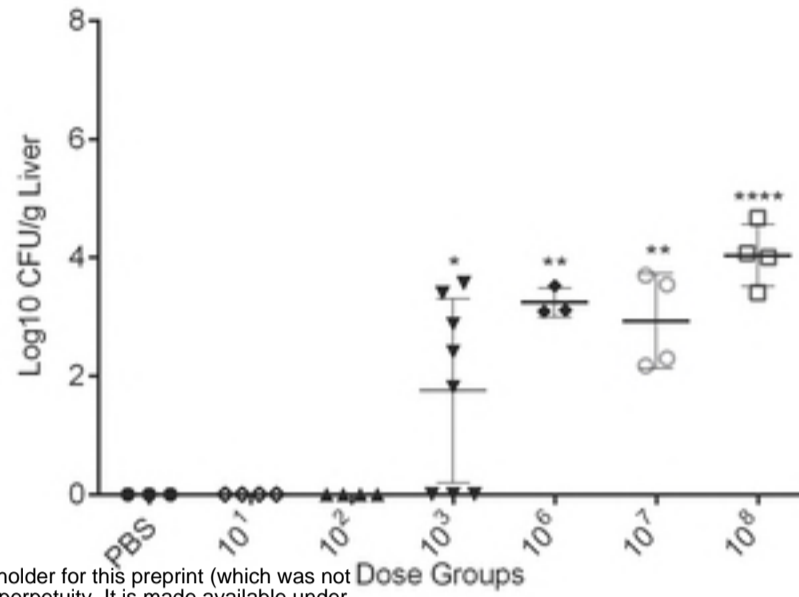

bioRxiv preprint doi: <https://doi.org/10.1101/457184>; this version posted October 30, 2018. The copyright holder for this preprint (which was not certified by peer review) is the author/funder, who has granted bioRxiv a license to display the preprint in perpetuity. It is made available under aCC-BY 4.0 International license.

### C. Lung

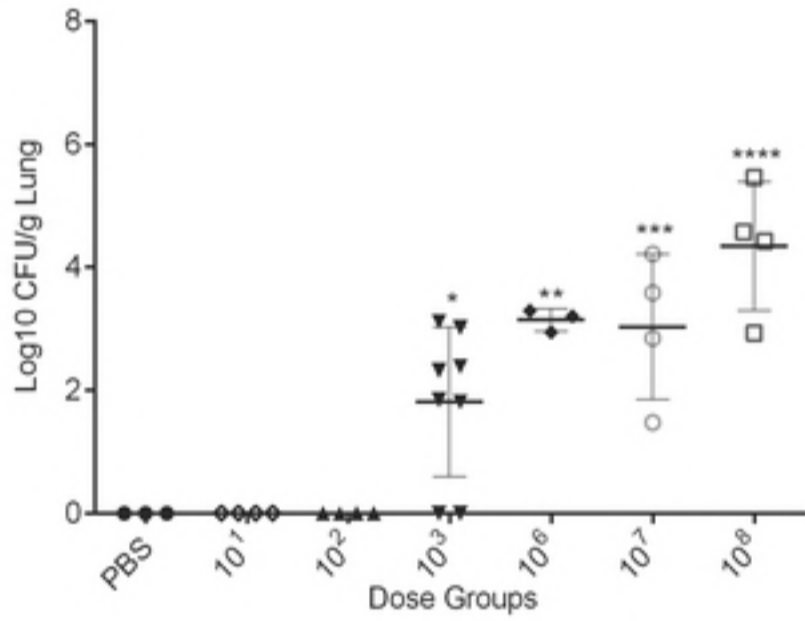

### D. Uterus

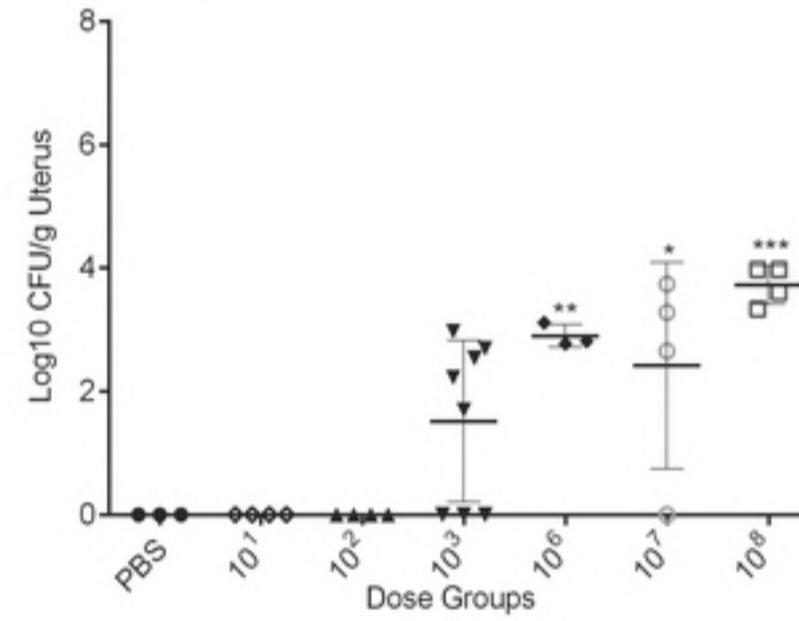

### E. Cervical lymph node

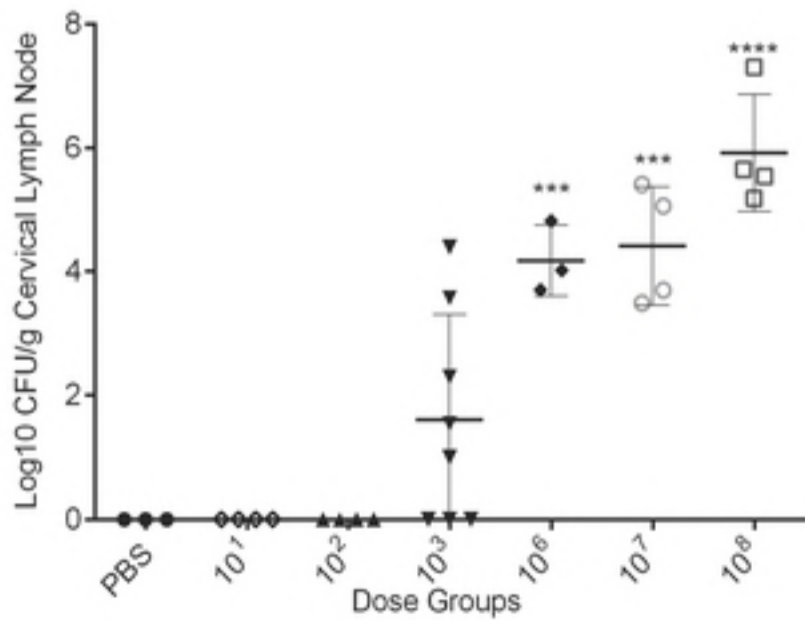

### F. Tracheobronchial lymph node

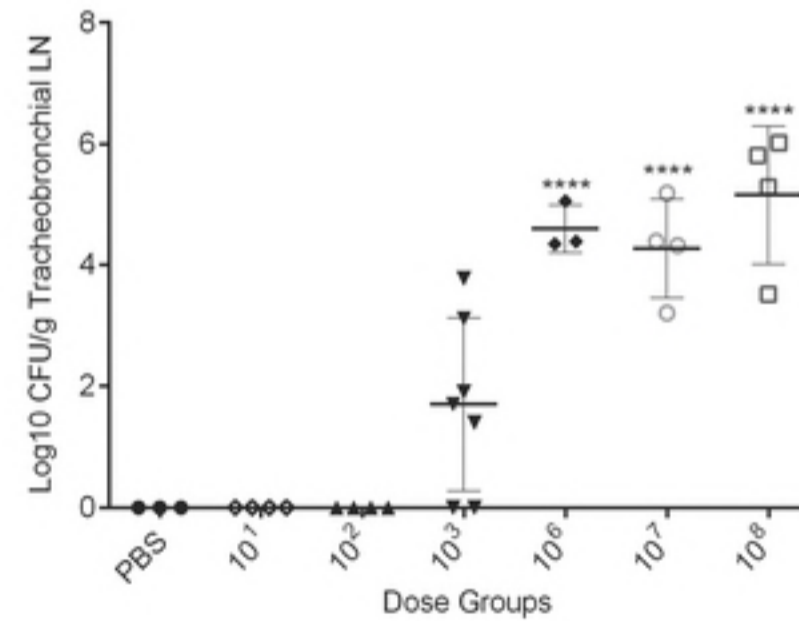

Figure 3

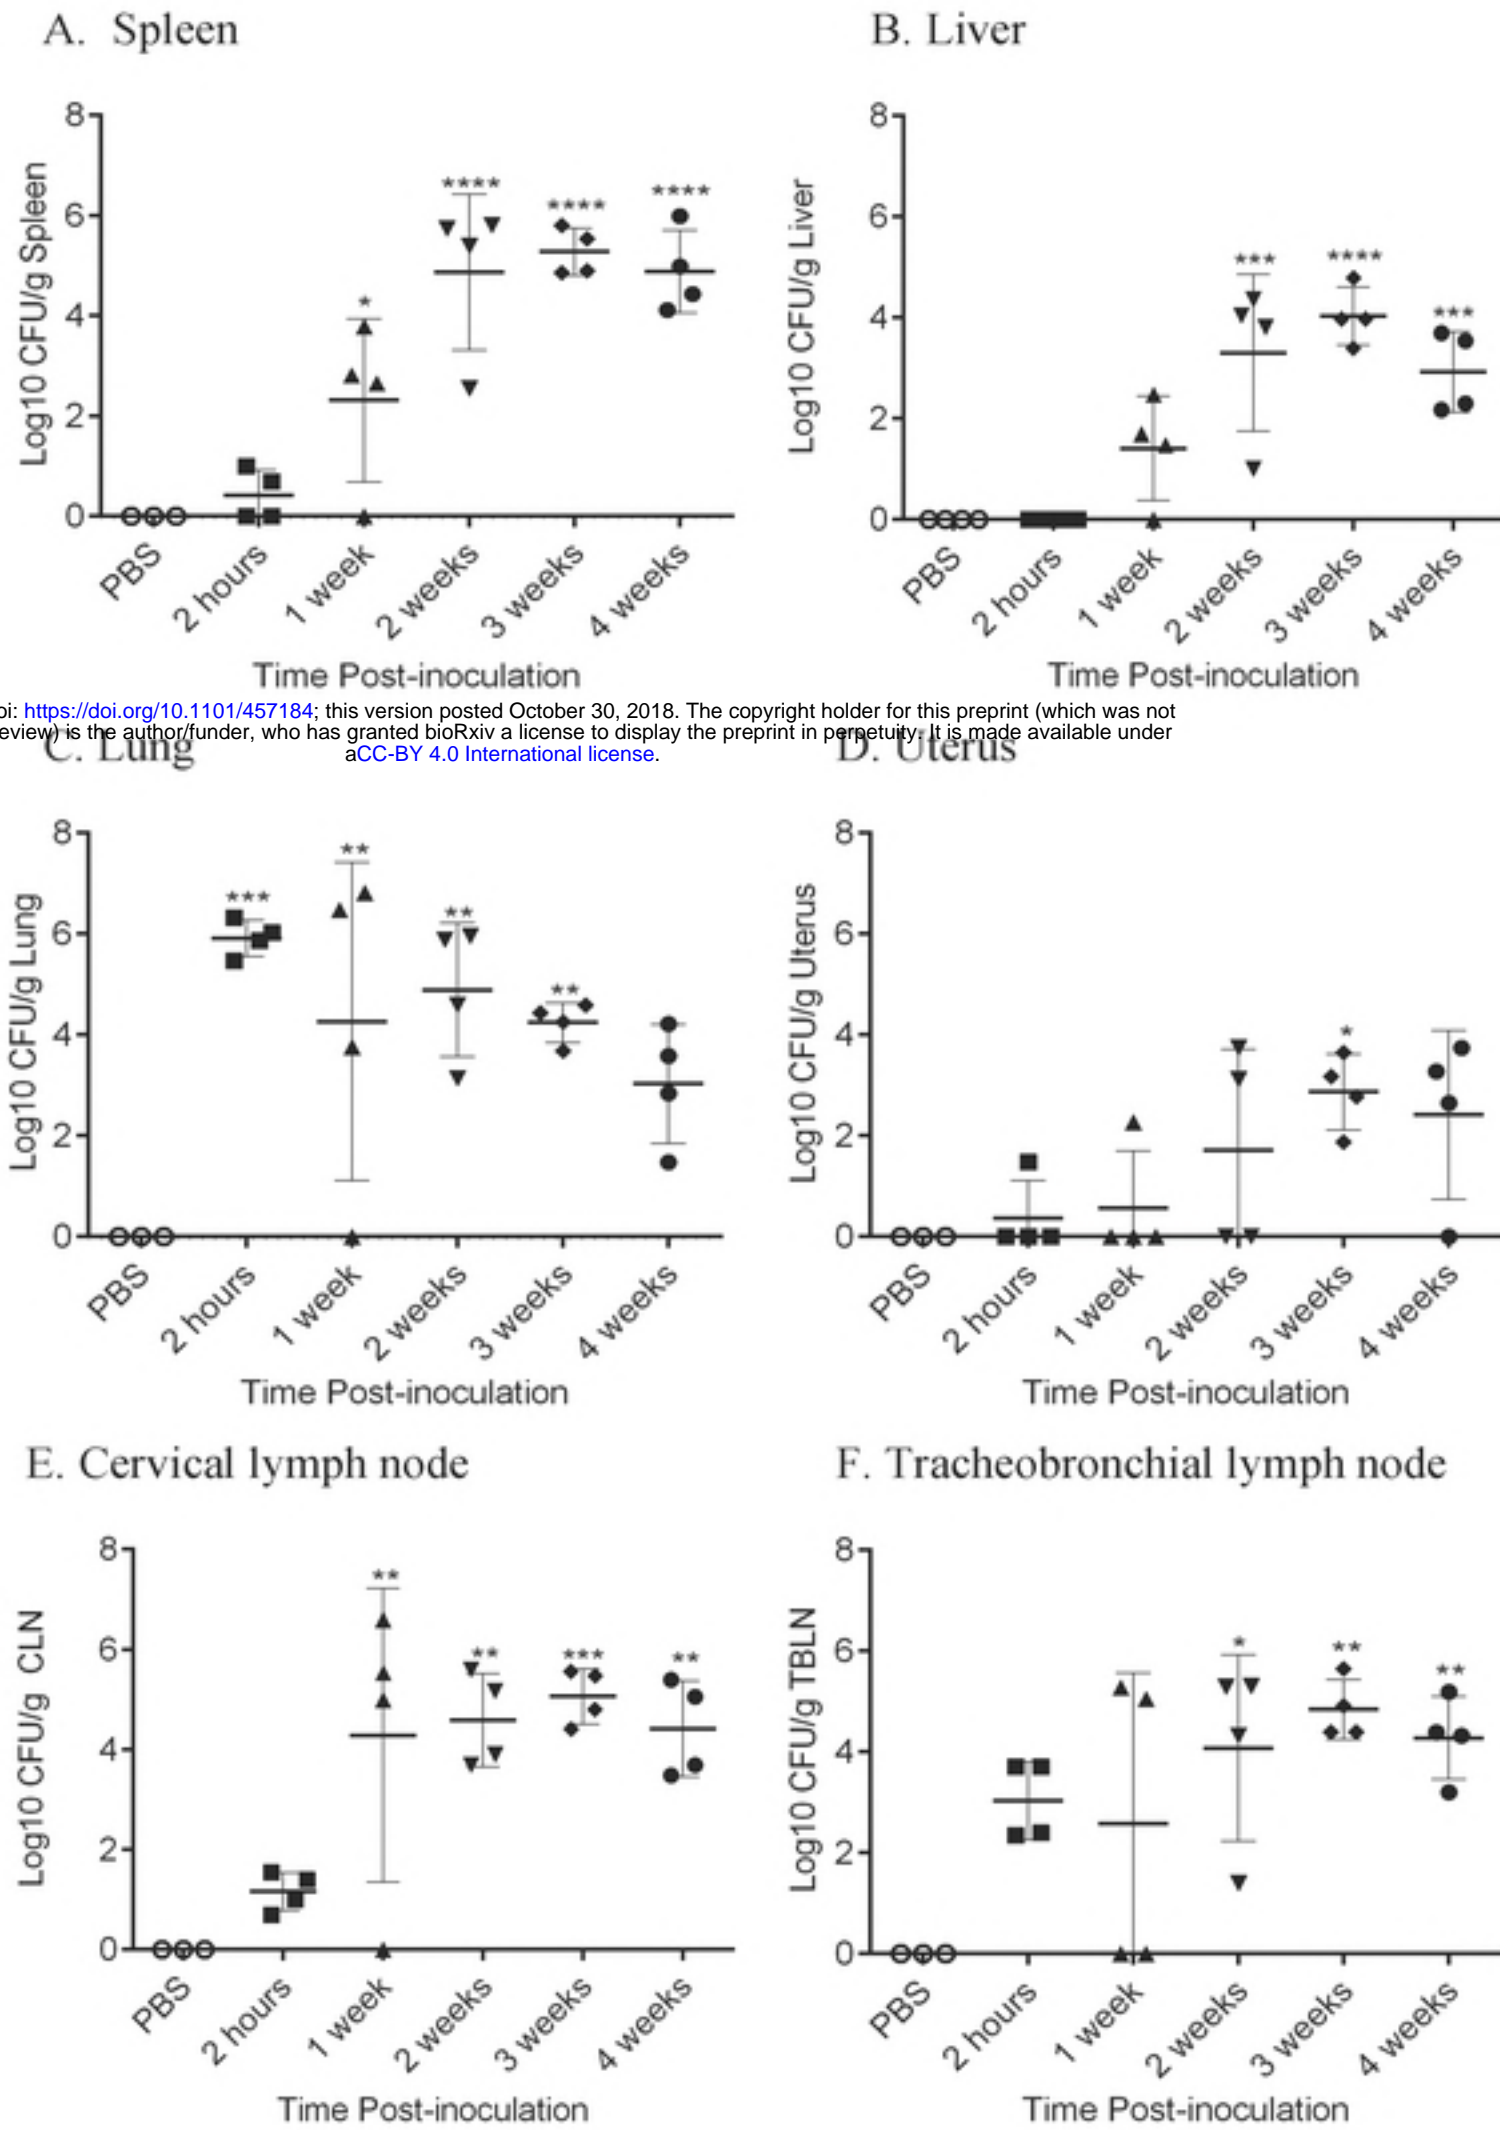

bioRxiv preprint doi: <https://doi.org/10.1101/457184>; this version posted October 30, 2018. The copyright holder for this preprint (which was not certified by peer review) is the author/funder, who has granted bioRxiv a license to display the preprint in perpetuity. It is made available under aCC-BY 4.0 International license.

Figure 4

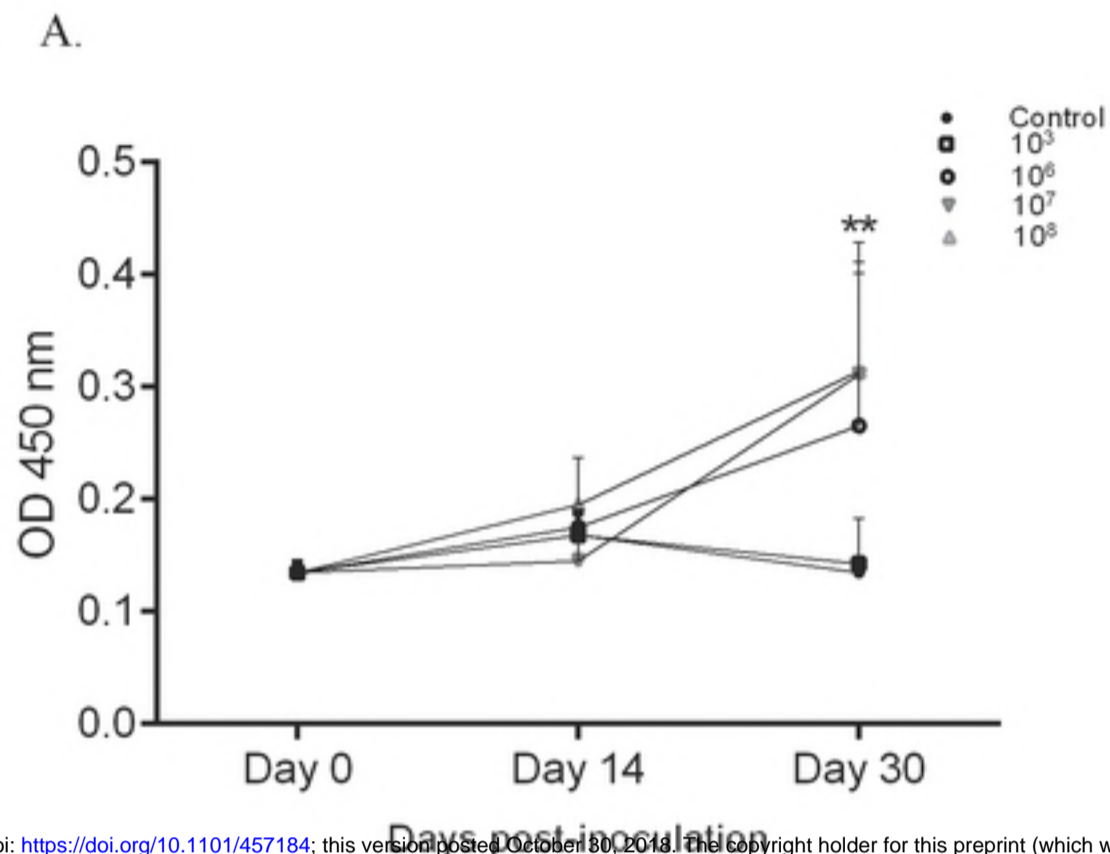

bioRxiv preprint doi: <https://doi.org/10.1101/457184>; this version posted October 30, 2018. The copyright holder for this preprint (which was not certified by peer review) is the author/funder, who has granted bioRxiv a license to display the preprint in perpetuity. It is made available under aCC-BY 4.0 International license.

**FIG 8** Anti-*Brucella* specific IgG ELISA with sera from guinea pigs inoculated by intratracheal route with *B. melitensis* 16M at doses of  $10^3$ ,  $10^6$ ,  $10^7$ ,  $10^8$ , or uninfected control (A) at day 0, 14, and 30 post-inoculation. Guinea pigs in the  $10^7$  and  $10^8$  groups developed a statistically significant humoral response to inoculation with *B. melitensis*. The results are expressed as the mean absorbance ( $\pm$  standard error). Statistical significance was determined by ANOVA followed by Dunnett's multiple-comparison of each group (n=4) to the uninfected controls (n=3). Two asterisks,  $P < 0.01$ .

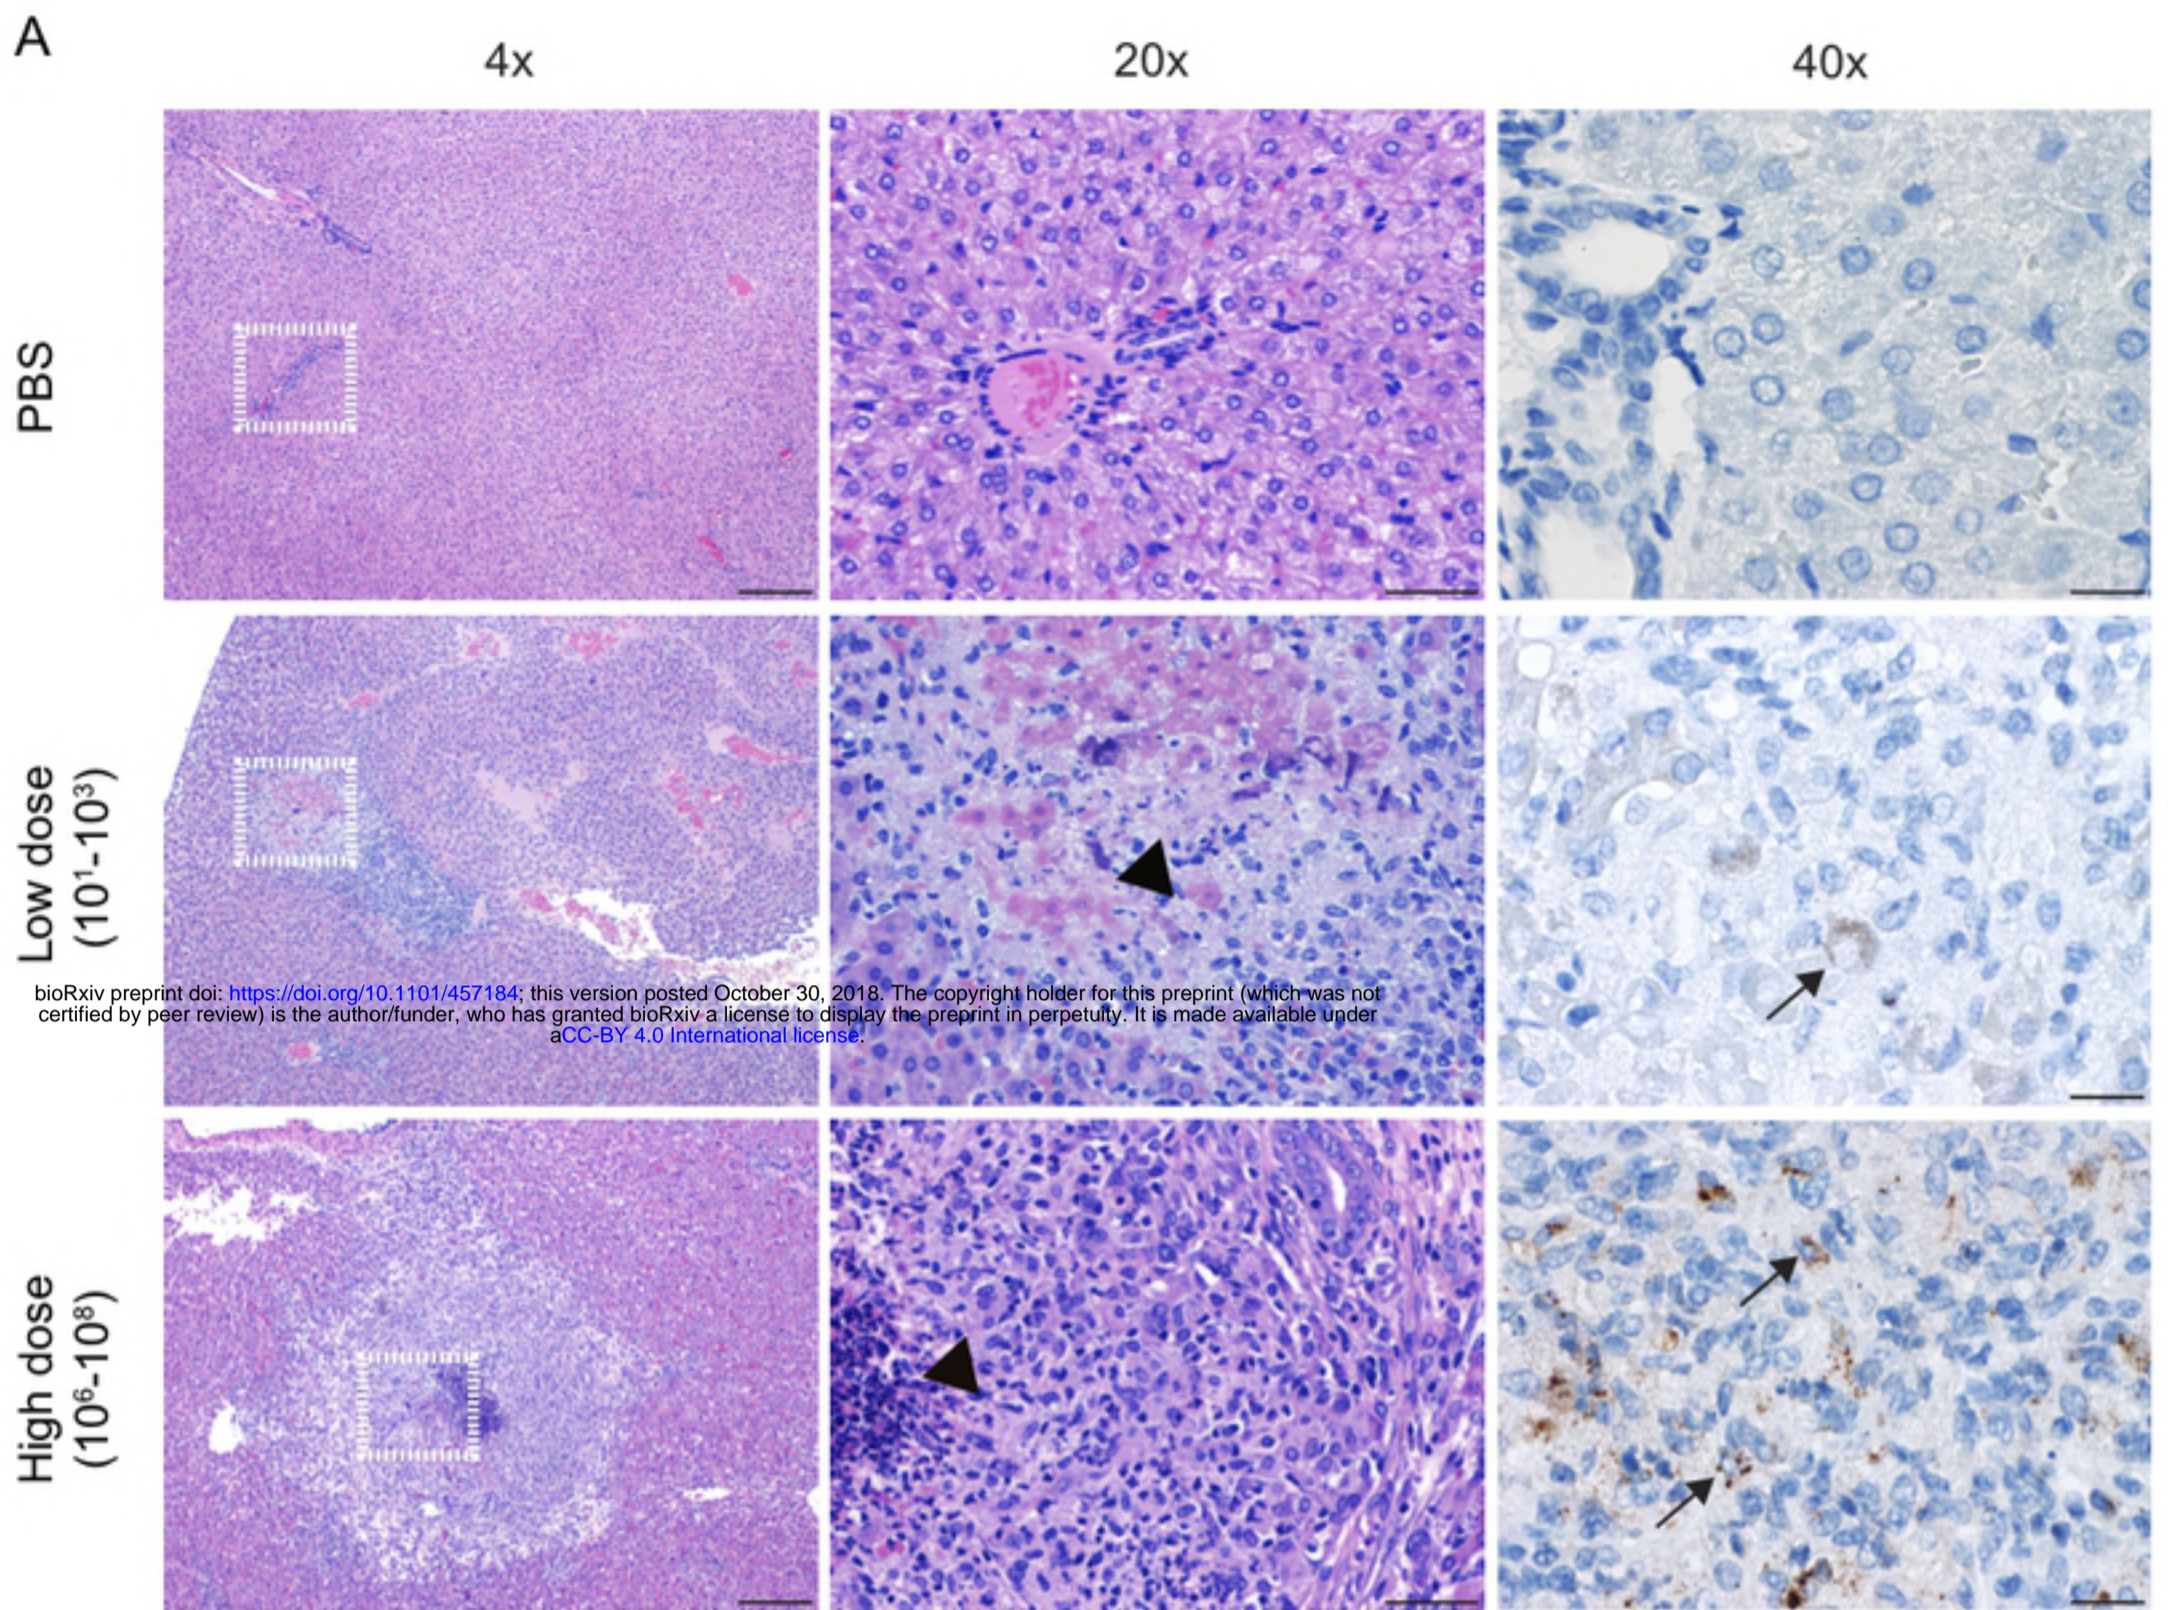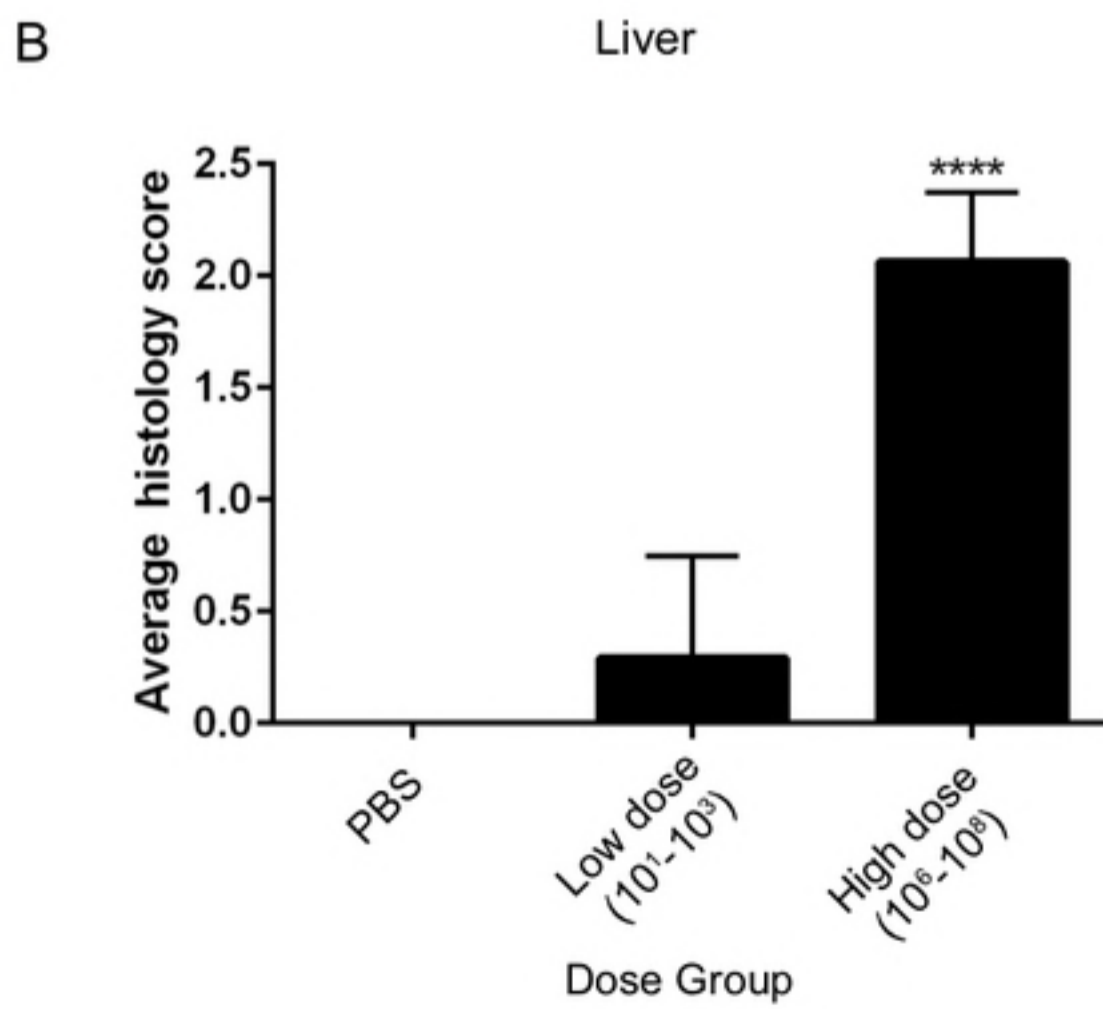

Figure 6

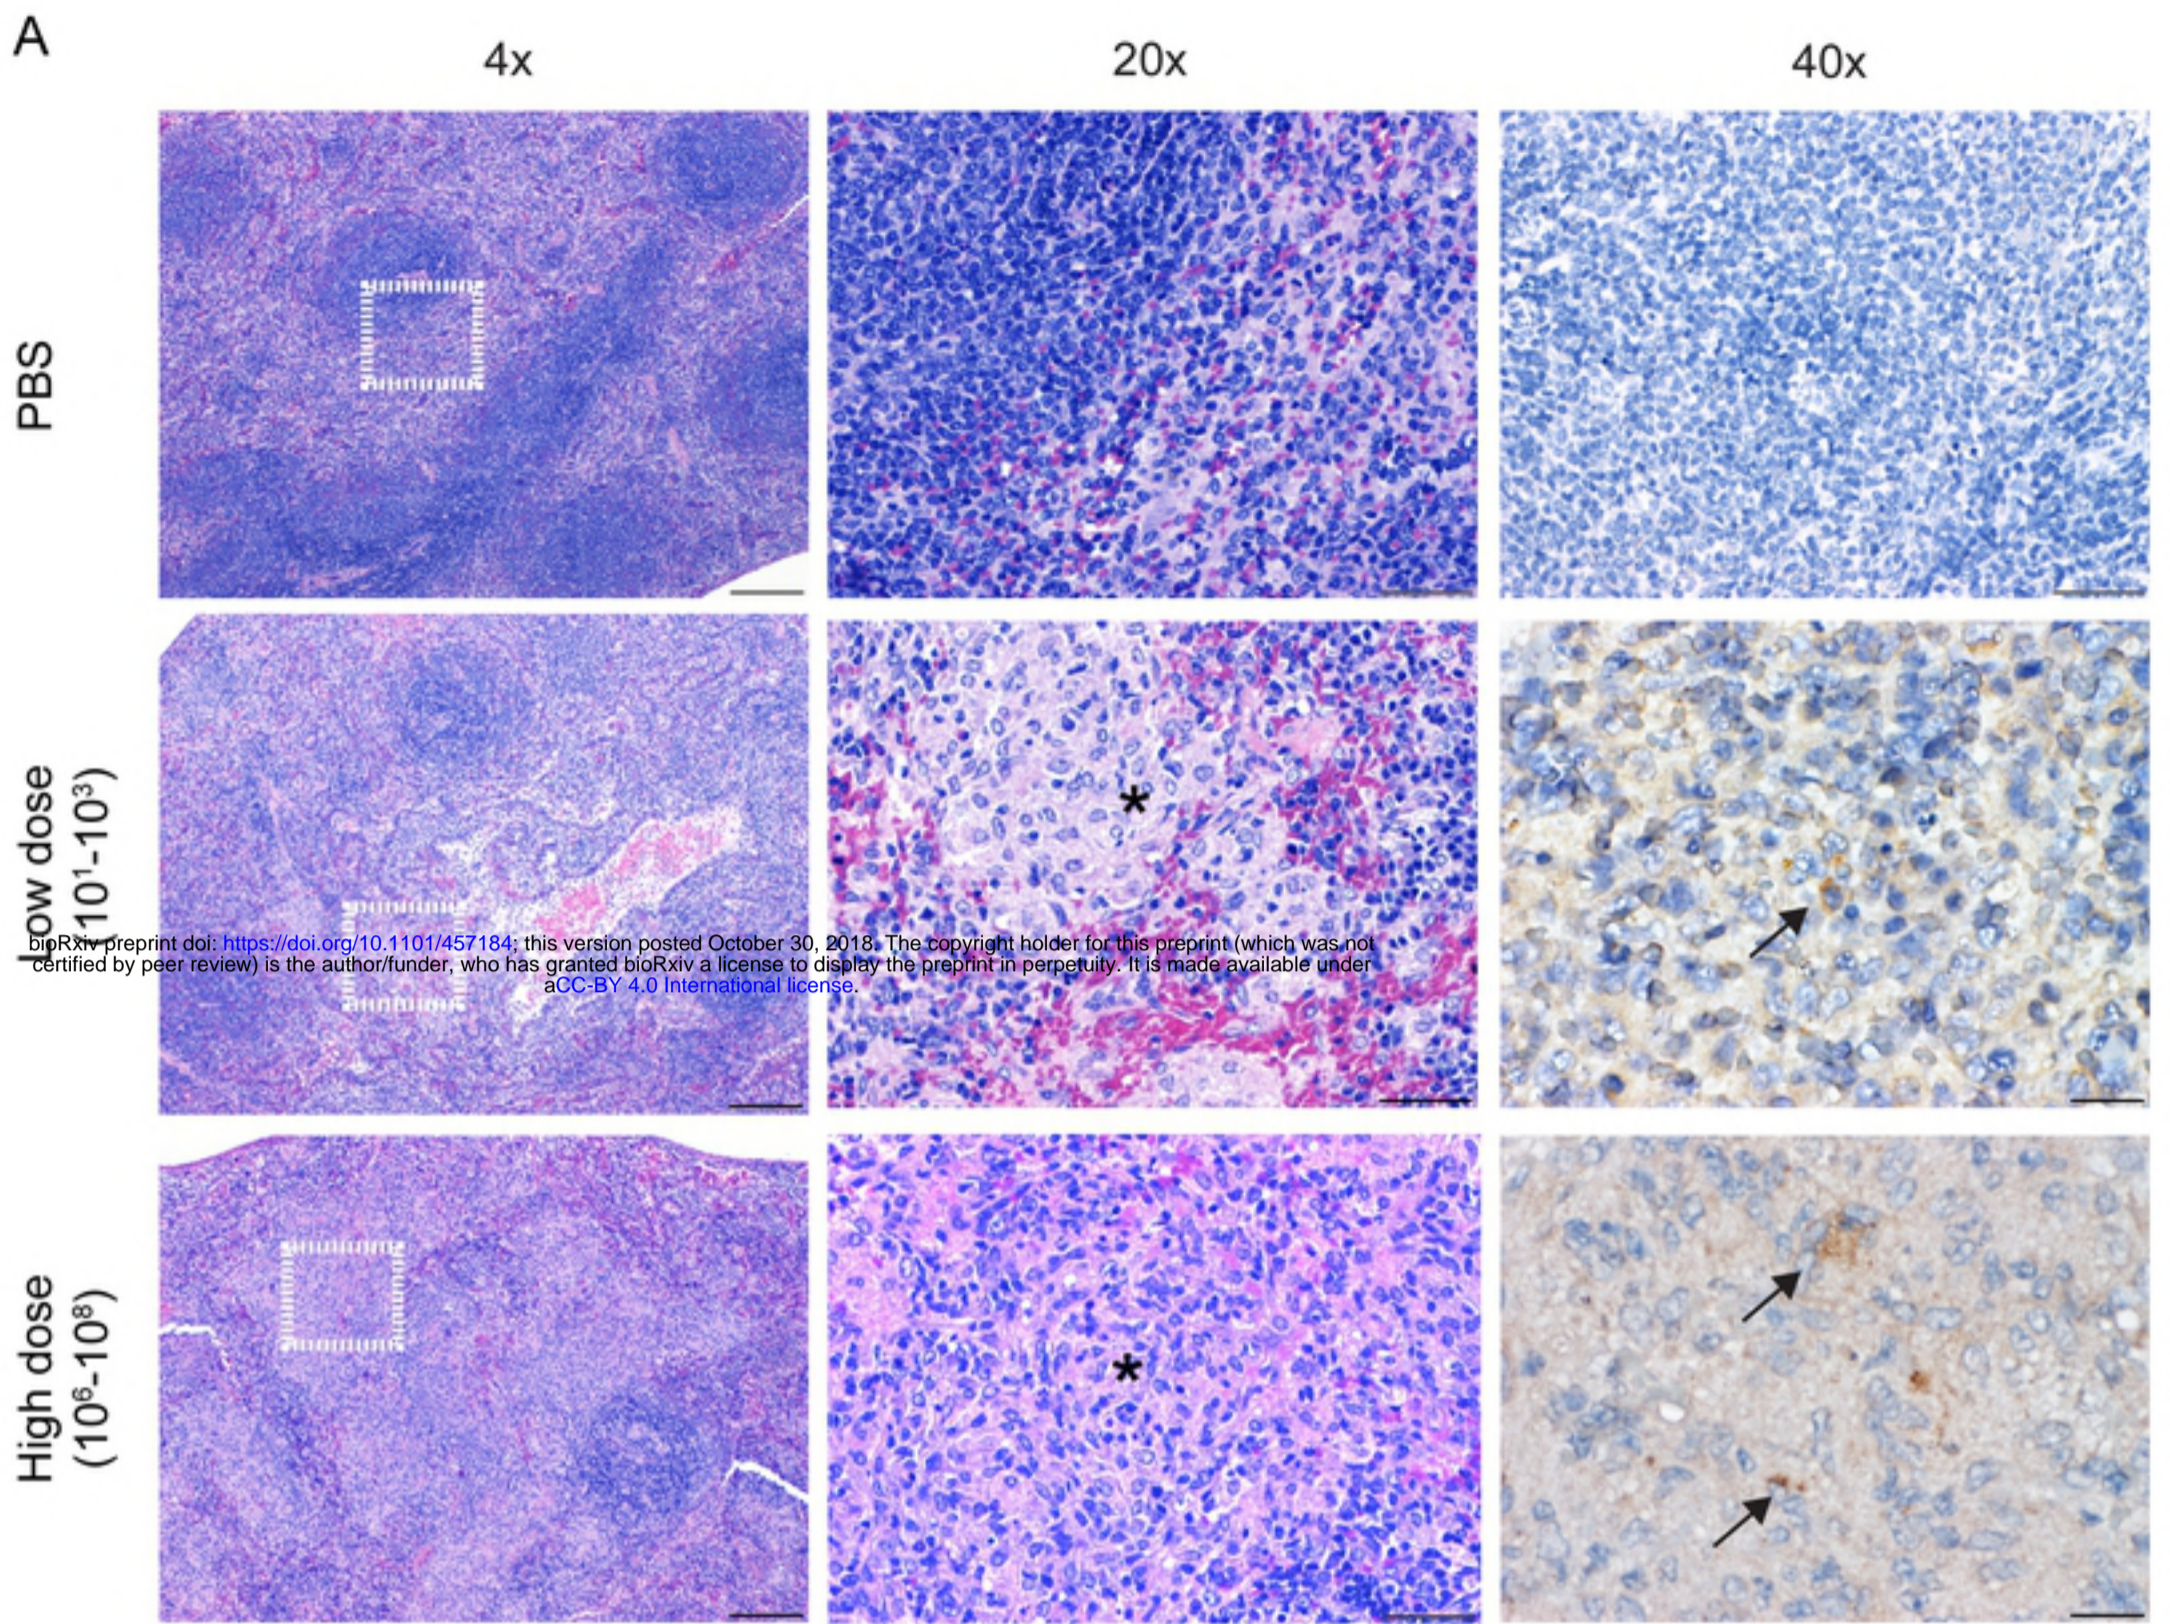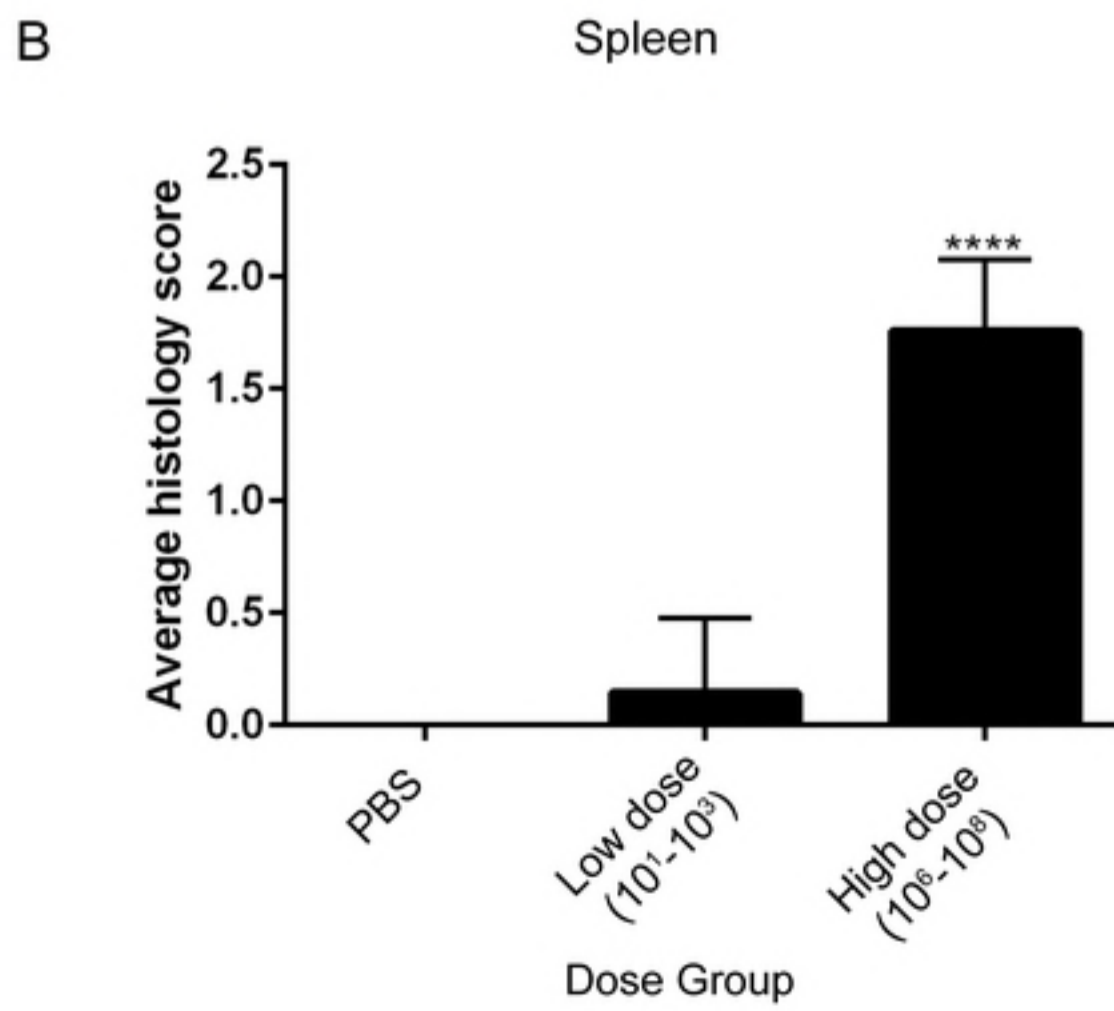

Figure 5



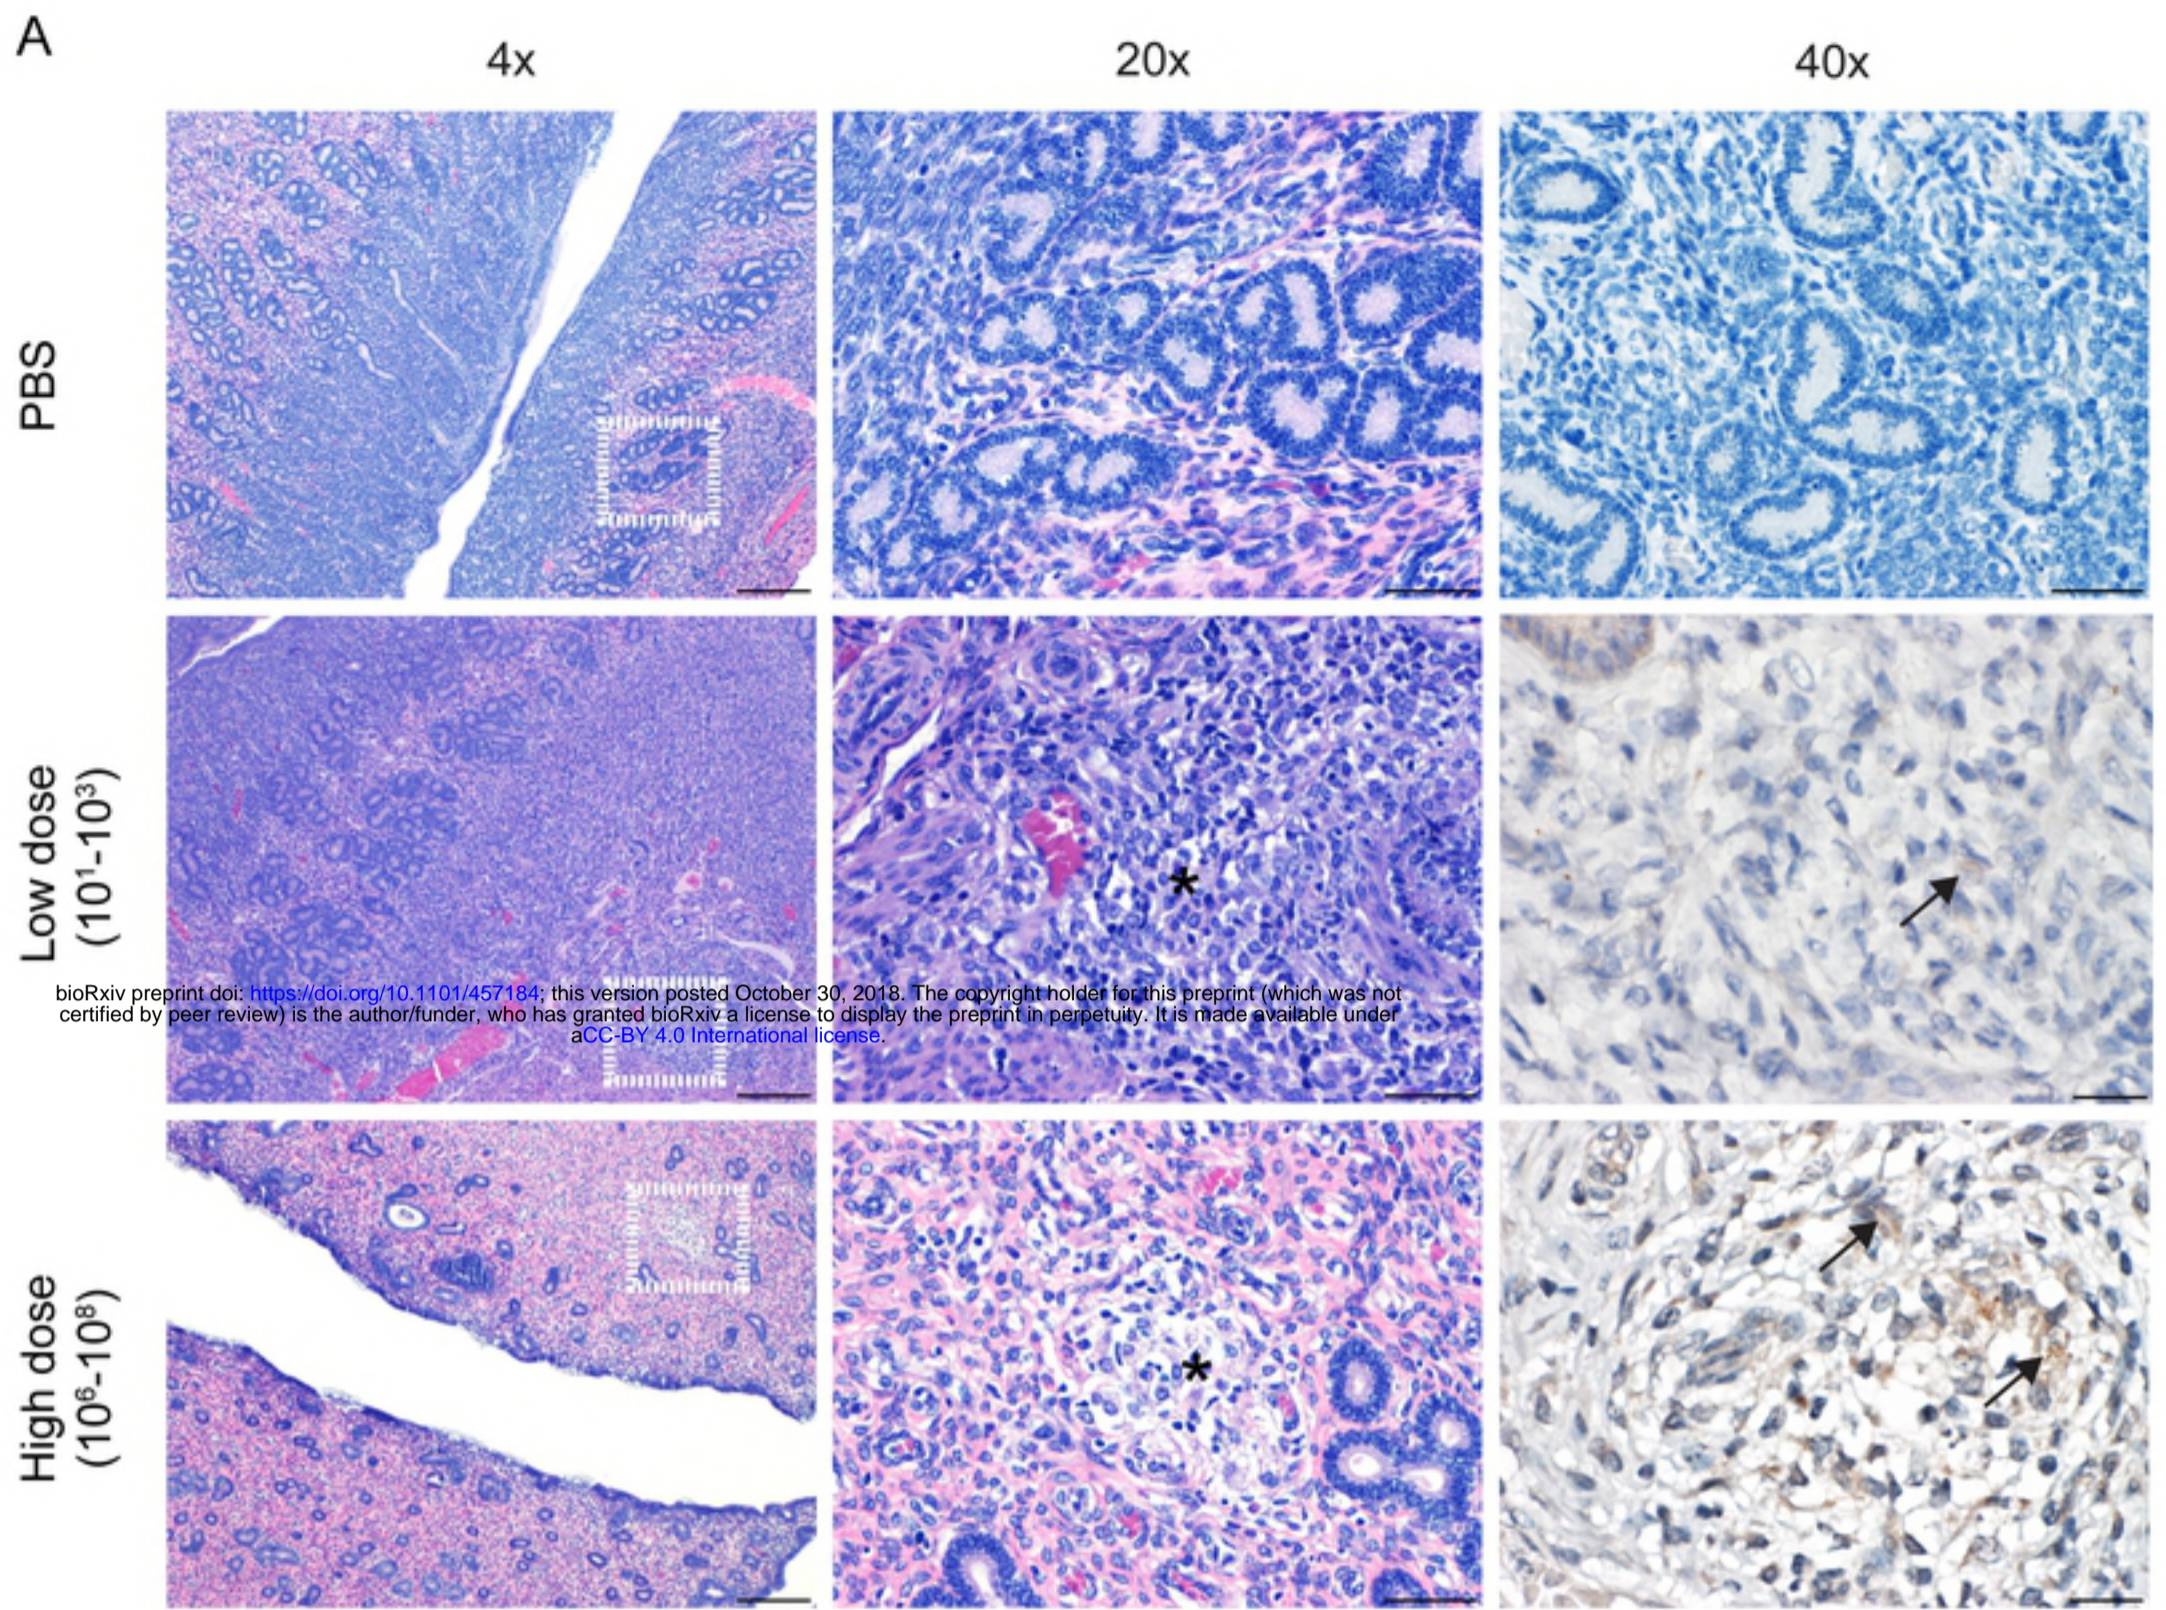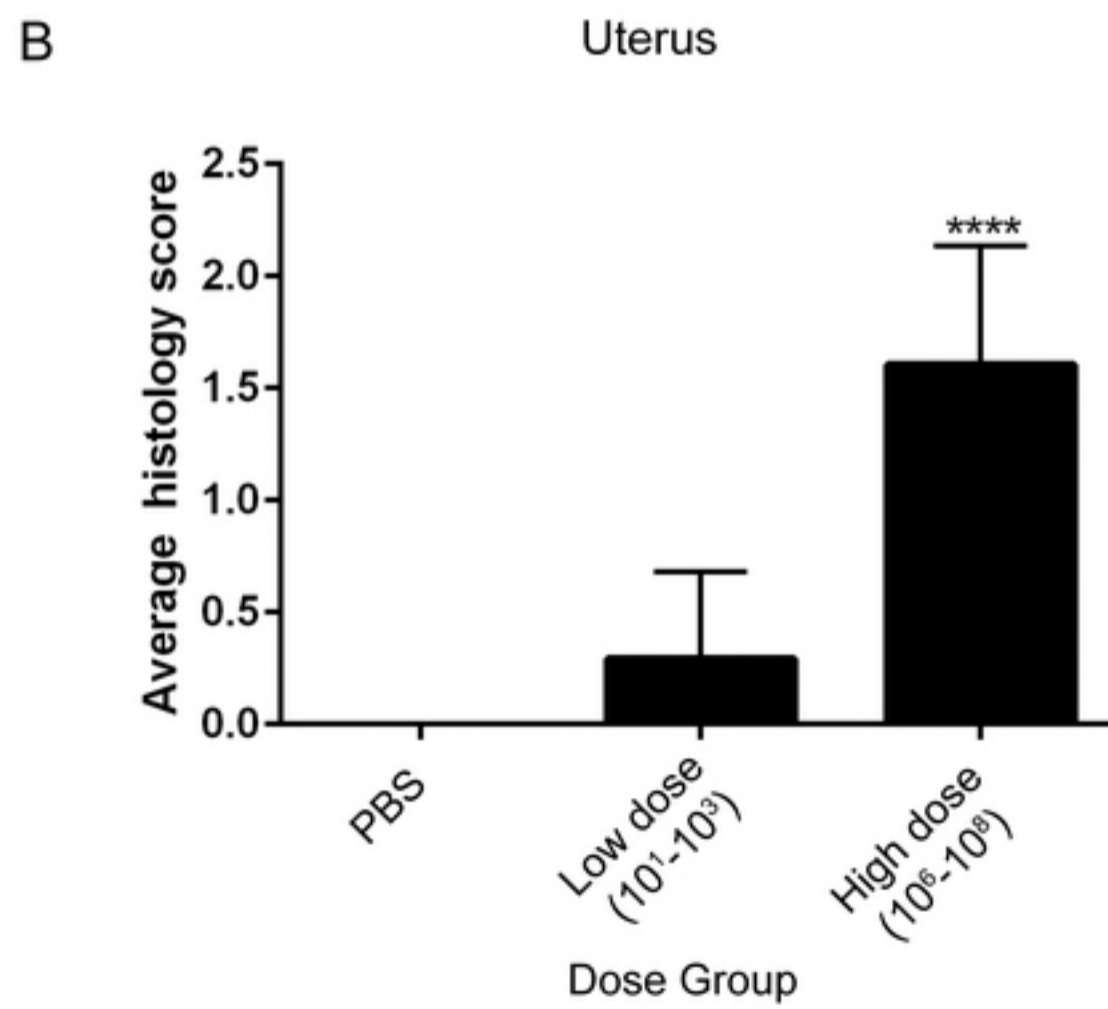

Figure 7
